# 1 The elasticity of individual protocadherin 15 molecules 2 implicates cadherins as the gating springs for hearing

3 Tobias F. Bartsch<sup>1,\*</sup>, Felicitas E. Hengel<sup>1,†</sup>, Aaron Oswald<sup>1,†</sup>, Gilman Dionne<sup>2</sup>, Iris V. Chipendo<sup>1</sup>,  
4 Simranjit S. Mangat<sup>1</sup>, Muhammad El Shatanofy<sup>1</sup>, Lawrence Shapiro<sup>2</sup>, Ulrich Müller<sup>3</sup>, and  
5 A. J. Hudspeth<sup>1</sup>

6 **Hair cells, the sensory receptors of the inner ear, respond to mechanical forces originating from**  
7 **sounds and accelerations<sup>1,2</sup>. An essential feature of each hair cell is an array of filamentous tip**  
8 **links, consisting of the proteins protocadherin 15 (PCDH15) and cadherin 23 (CDH23)<sup>3</sup>, whose**  
9 **tension is thought to directly gate the cell's transduction channels<sup>4,5,6</sup>. These links are**  
10 **considered far too stiff to represent the gating springs that convert hair-bundle displacement**  
11 **into forces capable of opening the channels<sup>7,8</sup>, and no mechanism has been suggested through**  
12 **which tip-link stiffness could be varied to accommodate hair cells of distinct frequency**  
13 **sensitivity in different receptor organs and animals. As a consequence, the gating spring's**  
14 **identity and mechanism of operation remain central questions in sensory neuroscience. Using**  
15 **a high-precision optical trap, we show that an individual monomer of PCDH15 acts as an**  
16 **entropic spring that is much softer than its enthalpic stiffness alone would suggest<sup>7,8</sup>. This low**  
17 **stiffness implies that the protein is a significant part of the gating spring that controls a hair**  
18 **cell's transduction channels. The tip link's entropic nature then allows for stiffness control**  
19 **through modulation of its tension. We find that a PCDH15 molecule is unstable under tension**  
20 **and exhibits a rich variety of reversible unfolding events that are augmented when the Ca<sup>2+</sup>**  
21 **concentration is reduced to physiological levels. Tip-link tension and Ca<sup>2+</sup> concentration are**  
22 **therefore likely parameters through which nature tunes a gating spring's mechanical**  
23 **properties.**

24

---

25 <sup>1</sup>Howard Hughes Medical Institute and Laboratory of Sensory Neuroscience, The Rockefeller  
26 University, New York, NY 10065, USA. <sup>2</sup>Department of Biochemistry and Molecular Biophysics,  
27 Zuckerman Mind Brain Behavior Institute, Columbia University, New York, NY 10032, USA. <sup>3</sup>The  
28 Solomon Snyder Department of Neuroscience, Johns Hopkins University, Baltimore, MD  
29 21205, USA. \*E-mail: [tbartsch@rockefeller.edu](mailto:tbartsch@rockefeller.edu). <sup>†</sup>These authors contributed equally to this  
30 work.

31 Mechanically gated ion channels are ubiquitous. In addition to underlying our senses of hearing,  
32 balance, and touch, they are involved in the regulation of processes such as muscle extension,  
33 blood pressure, pulmonary inflation, and visceral distension. These channels are opened and  
34 closed through the action of gating springs, which are elastic elements that are tensioned by  
35 mechanical stimulation and in turn communicate stress to the molecular gates of the respective  
36 channels. Gating springs accordingly store mechanical energy and use it to regulate channels'  
37 open probabilities. For bacterial mechanoreceptors, which respond to osmotic stress, the cellular  
38 membrane itself serves as a gating spring<sup>9</sup>. The ubiquitous Piezo channels of vertebrates extend  
39 three membrane-embedded arms that likely act as gating springs by flexing in response to  
40 membrane stretching<sup>10,11</sup>. Other mechanosensitive channels, such as NOMPC (TRPN1) in  
41 *Drosophila*, appear to be gated by the tension in elastic ankyrin domains<sup>12</sup>.

42 Gating springs were first posited for hair cells of the vertebrate inner ear, the sensors of  
43 the auditory and vestibular systems<sup>4</sup>. Each hair cell is surmounted by a hair bundle—a cluster of  
44 erect, actin-filled processes termed stereocilia—that is deflected by mechanical stimulation.  
45 However, the identity of the gating springs in these cells has remained controversial. A plausible  
46 candidate discovered soon after the gating-spring hypothesis was advanced is the tip link.  
47 Extending about 150 nm between the tip of each stereocilium and the side of its longest  
48 neighbor, the tip link is positioned to sense the shear between stereocilia when a hair bundle is  
49 deflected (Figure 1a,b)<sup>5,13</sup>. The tip link is a dimer of parallel dimers, comprising two PCDH15  
50 molecules joined at their amino termini to a pair of CDH23 molecules through a "handshake"

51 whose stability depends upon the presence of bound  $\text{Ca}^{2+}$  ions (Figure 1c)<sup>14</sup>. The mechanical  
52 properties of hair bundles imply a gating-spring stiffness<sup>15,16</sup> on the order of  $1 \text{ mN}\cdot\text{m}^{-1}$ . However,  
53 electron-microscopic images suggest that the tip link is relatively rigid<sup>17</sup> and crystallographic  
54 studies and molecular-dynamics simulations of the relevant cadherins support a stiffness fiftyfold  
55 as great as that measured<sup>7</sup>. It has therefore been posited that most of a gating spring's elasticity  
56 resides at a tip link's two attachments, rather than within the link itself. To clarify the identity of  
57 the hair cell's gating spring, we have therefore examined the elastic properties of a tip-link  
58 protein.

### 59 **Measurement of PCDH15's mechanical characteristics**

60 The mechanics of a protein can be tested by tethering it between two surfaces, applying a force  
61 that pulls the surfaces apart, and measuring the protein tether's elongation<sup>18</sup>. To explore directly  
62 the stiffness of a tip link, we used a high-precision optical trap to determine the mechanical  
63 properties of individual molecules of PCDH15. The extracellular portion of PCDH15 consists of  
64 eleven extracellular cadherin domains (EC1-EC11) followed by the membrane-proximal PICA  
65 domain. PCDH15 forms a homodimer through interfaces in EC3 and in PICA (Figure 1c)<sup>19,20</sup>,  
66 hampering our study of the monomeric protein. We therefore introduced a dimerization-  
67 disrupting mutation (V250D)<sup>19</sup> into EC3 and truncated the protein just before the PICA domain  
68 (Figure 1d).

69 Using a short, site-specific anchor at each of the protein's ends, we placed PCDH15  
70 between an immobile,  $2 \mu\text{m}$ -diameter glass pedestal bead and a mobile  $1 \mu\text{m}$  probe bead. Short,  
71 stiff anchors were necessary to avoid masking the elastic properties of PCDH15 by those of the  
72 anchors (Figure 1f). The probe bead was confined in a weak optical trap whose forward-scattered  
73 light we collected to determine the three-dimensional position of the bead with sub-nanometer  
74 spatial and  $1 \mu\text{s}$  temporal resolution<sup>21,22</sup>. A second optical trap, displaced by a few hundred  
75 nanometers from the first, served to deliver a force stimulus. By increasing the trap's stiffness,  
76 we could apply forces up to and exceeding  $60 \text{ pN}$  to the tethered protein (Figure 1f).

77 Cadherin domains manifest a stereotyped, immunoglobulin-like Greek key folding motif  
78 and are separated from one another by conserved linkers that each bind up to three  $\text{Ca}^{2+}$  ions in  
79 a canonical arrangement (Figure 1e)<sup>23</sup>.  $\text{Ca}^{2+}$  binding is thought to rigidify the linker regions and to  
80 stabilize the cadherin domains against force-induced unfolding that elongates the molecule<sup>24</sup>.  
81 The  $\text{Ca}^{2+}$  concentration of the endolymph, the fluid surrounding tip links, varies between different  
82 organs and species from tens to hundreds of micromolar<sup>25,26</sup>. Such concentrations are close to  
83 the  $\text{Ca}^{2+}$  dissociation constants for the various binding sites<sup>7,27</sup>, raising the intriguing possibility  
84 that nature adjusts the  $\text{Ca}^{2+}$  concentration to tune the mechanics of tip-link cadherins. We  
85 therefore explored the behavior of tensioned PCDH15 at three  $\text{Ca}^{2+}$  concentrations: 3 mM, to  
86 saturate all binding sites; 20  $\mu\text{M}$ , a concentration that mimics the concentration of  $\text{Ca}^{2+}$  in the  
87 endolymph of the mammalian cochlea<sup>25</sup>; and zero.

88 Because structural changes in proteins are stochastic events that are driven by thermal  
89 forces, the rate at which external force is applied can dramatically change the mechanical  
90 response. If a protein is pulled too fast, thermal forces do not have sufficient time to cause barrier  
91 crossing in the protein's energy landscape before very high external forces are reached.  
92 Consequently, the forces at which structural changes occur are artificially elevated at high loading  
93 rates<sup>28</sup>. Even in the absence of an acoustic stimulus, tip links experience a constant resting  
94 tension<sup>29</sup> that varies with the frequency sensitivity of a hair cell, from 8 pN at 1 kHz to 50 pN at  
95 4 kHz, with possibly even greater tensions at higher frequencies<sup>16</sup>. In each tip link two copies of  
96 PCDH15 act in parallel, and each copy assumes half of the tension of the entire link, 4 pN up to  
97 at least 25 pN. During normal hearing, a sound stimulus then superimposes an oscillation of only  
98 a few piconewtons on this resting tension. Our experiments therefore had to apply slowly  
99 changing forces to explore the influence of resting tension on the mechanics of PCDH15.

100 We applied force ramps to the single-molecule tethers at a loading rate of  $130 \text{ pN}\cdot\text{s}^{-1}$   
101 (unless noted otherwise) by linearly increasing the spring constant of the stimulus trap (Extended  
102 Data Fig. 1). This rate represented a compromise between slow force application and our desire  
103 to collect a statistically relevant number of extension-relaxation cycles for each molecule tested

104 in a reasonable amount of time. For each cycle, we ramped the force up to 60 pN to cover the  
105 entire range of physiologically relevant tensions, then returned it at the same rate to a holding  
106 level of 2-4 pN. Depending on the  $\text{Ca}^{2+}$  concentration, we adjusted the holding level and duration  
107 to allow the protein to refold domains after many but not all cycles. The chosen loading rate  
108 likewise led to unfolding events in only a subset of cycles. With these parameter choices we were  
109 able to trap the protein in a given conformational state for several extension-relaxation cycles,  
110 allowing us to precisely characterize the mechanics of each state.

111 Figure 2a-c shows representative examples of individual force-extension relations for  $\text{Ca}^{2+}$   
112 concentrations of 3 mM, 20  $\mu\text{M}$ , and zero. Each curve features a hockey stick-like shape, as  
113 expected for the extension of a biopolymer in a heat bath<sup>30</sup>. As we quantify below, this functional  
114 shape indicates that entropic effects dominate PCDH15's elastic response. Abrupt, stepwise  
115 extensions or "rips" in the force-extension relations correspond to structural changes of the  
116 protein under force. In contrast to typical single-molecule experiments, under our loading  
117 conditions PCDH15 never fully unfolded during the extension phase of the stimulus. We therefore  
118 frequently observed extensional structural changes even in the relaxation phase of the stimulus.  
119 For each  $\text{Ca}^{2+}$  concentration, a set of conformational changes leads to a modulated occupation  
120 of the force-extension state space, which we visualize by overlapping hundreds of extension-  
121 relaxation cycles for one representative molecule apiece (Figure 2d-f).

## 122 **Conformational changes**

123 Rips in the force-extension relations at physiological forces suggest that PCDH15 exists in  
124 different structural states during hearing. At a saturating  $\text{Ca}^{2+}$  concentration, the conformational  
125 states accessible to the protein are limited: the state-space heatmap reveals only two major  
126 configurations (Figure 2d). The second of these is further divided into two sub-states separated  
127 by a difference of only a few nanometers in contour length. State 1 reflects the extensibility of  
128 fully folded PCDH15 (Extended Data Note 1). By fitting a polymer model to the force-extension  
129 relations for five molecules, we find that State 2 arises from a combination of two classes of

130 conformational changes leading to mean elongations of  $4.0 \pm 0.2$  nm and  $15.8 \pm 0.7$  nm  
131 (means  $\pm$  SEMs; respectively distributions of  $A_U$  and  $B_U$  in Figure 2g; Table 1). The structural origin  
132 of these conformational changes is unknown and difficult to determine owing to the large size of  
133 the protein. We can, however, rule out the unfolding of entire cadherin domains as the origin of  
134 the unfolding events. The length of the folded peptide in each of the eleven cadherin domains  
135 ranges from 94 to 123 amino acids, with a mean of 104 residues. At a contour length of 0.39 nm  
136 per residue<sup>31</sup>, the unfolding of each cadherin domain is expected to augment the contour length  
137 by about 36 nm: an elongation of 40.6 nm less 4.5 nm to account for the loss of the folded  
138 cadherin domain. The observed contour-length changes of the elongations  $A_U$  and  $B_U$  therefore  
139 represent protein rearrangements less extreme than the unfolding of a cadherin domain. At a  
140 saturating  $Ca^{2+}$  concentration and physiological forces, we never observed length changes in the  
141 wild-type protein great enough to account for the unfolding of entire cadherin domains.

142 We next asked whether there are unique structural features in PCDH15 that give rise to  
143 the elongations  $A_U$  and  $B_U$ , or whether several different conformational changes, each with a  
144 similar contour-length change, underlay the observed distributions. In most of the extension-  
145 relaxation cycles we did not observe more than one of either class of events (Extended Data  
146 Fig. 2). The rare occasions in which several events  $A_U$  or  $B_U$  were detected in a single trace were  
147 not reproducible across proteins or trials and could thus be explained as the rupture of non-  
148 specific interactions between the protein and either of the confining surfaces. We conclude that  
149 a single, unique structural alteration of PCDH15 is responsible for event  $A_U$ , whereas a distinct  
150 structural change results in event  $B_U$ , precluding the occurrence of several events of either type  
151 within the same cycle. Interestingly, the force sensitivity of events  $A_U$  is much narrower than that  
152 of events  $B_U$  (Figure 2j). From these distributions we determined the statistical dependence of  
153 both classes: an event  $A_U$  generally follows an event  $B_U$  ( $p < 0.05$  and  $p < 0.1$  for respectively three  
154 and two of the five tested molecules). It is plausible that both structural changes resulted from  
155 the same cadherin domain, with elongation  $B_U$  leading to a destabilization that facilitated  
156 elongation  $A_U$ .

157 We found the protein in State 1 at the beginning of many extension-relaxation cycles and  
158 concluded that there is a high probability of refolding of both event  $A_U$  and event  $B_U$  between  
159 cycles. We indeed routinely detected refolding events  $A_F$  during the relaxation phase of our  
160 protocol (Figure 2g), but rarely observed refolding events  $B_F$ . The latter events probably occurred  
161 only at very low forces, for which the slight shortening was lost in Brownian noise (Extended Data  
162 Fig. 3).

163 We next reduced the  $Ca^{2+}$  concentration to the physiological value of 20  $\mu M$  and exposed  
164 a tethered PCDH15 protein to the same force protocol. The extension-relaxation cycles showed  
165 conformational changes identical to the previously observed classes (Figure 2h;  $A_U$ :  $3.9 \pm 0.4$  nm,  
166  $B_U$ :  $15.0 \pm 0.6$  nm, means  $\pm$  SEMs,  $N = 8$ ). At this  $Ca^{2+}$  concentration, however, an additional class  
167 of unfolding events emerged with a contour-length change of  $35 \pm 1$  nm (mean  $\pm$  SEM;  $C_U$  in  
168 Figure 2b,h), in excellent agreement with the elongation expected for unfolding of an entire  
169 cadherin domain<sup>32</sup>. At holding forces of 2-4 pN the refolding of cadherin domains was a slow  
170 process and occurred on a time scale of seconds, in line with other proteins that feature  
171 immunoglobulin-like motifs<sup>33</sup>. In some extension-relaxation cycles we observed the successive  
172 unfolding of several cadherin domains (Extended Data Fig. 4). Because unfolding of any of the  
173 eleven extracellular cadherin domains should increase the contour length by a similar amount,  
174 we could neither assign unfolding events to particular domains nor elucidate the sequence in  
175 which the domains unraveled.

176 The heatmap of all force-extension relations originated from a mixture of the unfolding  
177 events  $A_U$ ,  $B_U$ , and  $C_U$  and their respective refolding events. The contour lengths that gave rise to  
178 the annotated States 1 to 8 (Figure 2e) were a consequence of the unfolding of up to three  
179 cadherin domains in series with up to one unfolding event of type  $B_U$ . Structural changes of type  
180  $A_U$  and  $A_F$ , which are clearly visible in the heatmap for a  $Ca^{2+}$  concentration of 3 mM as a  
181 subdivision of State 2 (Figure 2d), are not apparent in the state space at 20  $\mu M$  [ $Ca^{2+}$ ]. It is  
182 possible that there were  $Ca^{2+}$ -dependent sub-nanometer changes in the contour length that  
183 averaged out small effects of events  $A_U$  and  $A_F$  in the heatmap. We again investigated a potential

184 sequential dependence of unfolding classes by their force distributions (Figure 2k): even though  
185 events of type  $A_U$  followed events of type  $B_U$  at 3 mM  $[Ca^{2+}]$ , at a physiological  $Ca^{2+}$  concentration  
186 these structural changes in eight molecules were independent of one another ( $p > 0.1$  for each  
187 molecule). Moreover, events of types  $A_U$  and  $B_U$  were also independent of events of type  $C_U$ , the  
188 unfolding of entire cadherin domains.

189 We next investigated the mechanics of PCDH15 in the absence of  $Ca^{2+}$ . Representative  
190 force-extension relations feature a plethora of conformational changes (Figure 2c,i), many of  
191 which could no longer be clearly grouped into any of the classes  $A_{U,F}$  and  $B_U$ . Events with a mean  
192 of  $37 \pm 2$  nm (mean  $\pm$  SEM for five molecules) continued to characterize a well-defined class  $C_U$ .  
193 The heatmap of all extension-relaxation cycles had a structure reminiscent of that at a  $Ca^{2+}$   
194 concentration of 20  $\mu$ M (Figure 2f). The structure in the absence of  $Ca^{2+}$  arose from the unfolding  
195 of a discrete number of cadherin domains in series with the unclassifiable shorter structural  
196 changes that likely represented the partial unfolding of one or more domains. This lack of well-  
197 defined short structural changes was also evident from the force distribution of the observed rips  
198 (Figure 2l).

### 199 **Stiffness of PCDH15**

200 It is unknown whether tip-link cadherins are completely or only partially folded during normal  
201 hearing. We therefore investigated the stiffness not only of folded PCDH15 but also that of  
202 conformational states with a progressively greater number of unfolded domains. The total  
203 stiffness of PCDH15 comprises both enthalpic and entropic components, whose contributions we  
204 quantified by fitting the force-extension relations with a model of the protein as a freely jointed  
205 chain<sup>34</sup> formed by the eleven folded cadherin domains in series with a worm-like chain<sup>35</sup>  
206 representing the ten unstructured linker regions. We allowed enthalpic extensibility through a  
207 Hookean spring constant and included an additional worm-like chain to model any unfolded  
208 portions of the protein (Extended Data Fig. 5). Because the unfolded polypeptide chains and the  
209 linker regions are structurally similar, we modeled them both with the same persistence length;



210 fits to the data for thirteen molecules yielded  $l_{p_{\text{peptide}}} = 0.49 \pm 0.04$  nm (mean  $\pm$  SEM). For folded  
211 PCDH15 at a  $\text{Ca}^{2+}$  concentration of 3 mM, we found a length of  $2.9 \pm 0.5$  nm for each of the eleven  
212 solid segments of the chain, a length of  $1.4 \pm 0.5$  nm for each of the ten flexible linkers between  
213 the solid segments, and an enthalpic spring constant of  $9 \pm 4$  mN $\cdot$ m $^{-1}$  for the Hookean stiffness of  
214 the protein (means  $\pm$  SEMs,  $N = 5$  molecules, Table 1). The full length of a solid segment  
215 combined with its associated linker region was  $4.3 \pm 0.7$  nm, in excellent agreement with the  
216 value of 4.5 nm per cadherin repeat from crystal structures of cadherin domains<sup>23</sup>. Much to our  
217 surprise, these values did not change when the  $\text{Ca}^{2+}$  concentration was lowered to 20  $\mu$ M, the  
218 physiological level in the cochlea: an elevated  $\text{Ca}^{2+}$  concentration stabilizes cadherin domains  
219 against unfolding but does not augment the stiffness of the folded protein. The stiffness  
220 predicted by our model is in good agreement with the slopes of the different states in the state-  
221 space heatmap (Figure 3a,b).

222         Across all states and  $\text{Ca}^{2+}$  concentrations the measured and predicted stiffness of the  
223 protein is much smaller than its enthalpic stiffness of about 10 mN $\cdot$ m $^{-1}$ . The additional  
224 compliance is entropic, arising from the thermal motion of the individual cadherin domains and  
225 from thermal undulations in the inter-domain linker regions and unfolded polypeptide chains.  
226 When PCDH15 is tensed, this thermal kinking is smoothed out and the protein elongates. The  
227 progressive unfolding of domains further softens the protein by introducing additional  
228 disordered polypeptide chains (Figure 3b). At high forces most thermal bends have been  
229 straightened and the enthalpic elasticity begins to dominate the protein's response. Importantly,  
230 we find that for physiological tension the protein's response to force is dominated by entropic  
231 elasticity. The protein's stiffness approaches its enthalpic value only for unphysiologically high  
232 tensions (Figure 3, Extended Data Fig. 6).

### 233 **Unfolding of cadherin domains under forces relevant for hearing**

234 Elevated tension not only increases the stiffness of PCDH15 but also heightens the likelihood that  
235 entire cadherin domains unfold. Do cadherin domains unfold during normal hearing? If so, do

236 they refold under physiological conditions, or could tip links with persistently unstructured  
237 regions exist *in vivo*?

238 To determine the unfolding rate of cadherin domains under physiological tensions, we  
239 transformed the force distributions of type C<sub>U</sub> domain-unfolding events into unfolding rates as a  
240 function of constant force (Figure 4)<sup>28</sup>. For a given unfolding event we could not determine which  
241 of the eleven cadherin domains had unfolded, so our result was an average over several or all of  
242 the domains. The transformation additionally assumed that there was no cooperativity between  
243 the unfolding of individual domains. If the unfolding of one domain were to increase the  
244 probability that an adjacent domain would unravel, for example, our computed unfolding rates  
245 would have systematically overestimated the rate at which fully folded tip links unfold.

246 We computed unfolding rates for Ca<sup>2+</sup> concentrations of both 20 μM and zero (Figure 4).  
247 As expected, the presence of Ca<sup>2+</sup> stabilized cadherin against force-induced unfolding: in the ion's  
248 absence the domains unfolded many times faster than in its presence. With a physiological Ca<sup>2+</sup>  
249 concentration and at 20 pN of tension, the upper range of physiological resting values, a single  
250 cadherin domain unfolded at a rate of approximately once every 100 s. A fully folded PCDH  
251 molecule—consisting of 11 domains—then unfolded a domain every 10 s. At even higher  
252 tensions this rate rapidly increased, to roughly 0.4 s<sup>-1</sup> for the unfolding of a single cadherin  
253 domain at a tension of 60 pN. Because unfolding events at forces of 10-20 pN were extremely  
254 rare and might have corresponded to transitions from molten-globule states (Extended Data  
255 Note 2), we were unable to reliably calculate force-dependent unfolding rates for this force  
256 range. Extrapolation of the available data nevertheless suggests rates of approximately 0.003 s<sup>-1</sup>  
257 at 10 pN of tension. These results indicate that unfolding of cadherin domains would not take  
258 place within individual cycles of an auditory stimulus: for physiological forces the unfolding rate  
259 is much too low to follow stimuli with frequencies ranging from hundreds to thousands of hertz.  
260 However, provided that at the link's resting tension a domain's unfolding rate exceeds its  
261 refolding rate, cadherin domains in a tensed tip link could exist in a permanently unfolded state.  
262 We never observed refolding of cadherin domains during any of the recorded extension-

263 relaxation cycles, even though such events should be easily detectable at tensions exceeding  
264 4 pN (Extended Data Fig. 3). Refolding instead occurred only during the holding phase between  
265 successive cycles, provided the holding force was below 4 pN and the waiting time was on the  
266 order of several seconds. We conclude that for tensions higher than 20 pN per molecule the  
267 unfolding rate—although very small—exceeds the refolding rate. Our data indicate that this is  
268 also the case for the force range of 4-20 pN, but owing to the possible influence of molten-globule  
269 states we could not determine this with certainty. Our result suggests that some cadherin  
270 domains in tip links *in vivo* exist in a perpetually unfolded state. Such unfolded states would  
271 decrease the protein's stiffness (Figure 3b) and could be a mechanism by which a tip link softens  
272 even under high tension.

273         The critical force at which the unfolding and refolding rates of a cadherin domain are  
274 equal remains to be determined. However, the giant muscle protein titin, which has  
275 immunoglobulin folds similar to those of cadherin, exhibits a critical force<sup>33</sup> of 5.4 pN. If cadherin  
276 domains feature a similar value, the resting tensions in low-frequency hair cells might be less  
277 than the critical force and bias the tip link's domains towards a fully folded state, whereas the tip  
278 link might occur in a partially unfolded state in hair cells sensitive to high frequencies.

### 279 **Effect of a mutation associated with hearing loss**

280 Over one hundred mutations of the tip-link cadherins cause hearing loss in humans<sup>36</sup>. The  
281 deletion of residue V767 in EC7 is particularly interesting, for it leads to deafness—stemming  
282 from a deficit in the cochlea, with its low Ca<sup>2+</sup> concentration—but not a loss of function in the  
283 vestibular labyrinth—which enjoys a higher Ca<sup>2+</sup> concentration<sup>37</sup>. This mutation evidently does  
284 not hinder tip-link formation, but might change the elastic properties of the link.

285         We investigated how this deletion affects the mechanical properties of monomeric  
286 PCDH15 (V250D,  $\Delta$ V767) and found that there was a small but detectable probability that force  
287 unfolded a complete cadherin domain even when PCDH15 was saturated with Ca<sup>2+</sup> (Figure 5).  
288 During identical treatment of Ca<sup>2+</sup>-saturated proteins without pathologic mutations we never

289 observed the unfolding of complete domains (Figure 2g). By shortening one strand of EC7, the  
290 mutation likely caused a slight misalignment of amino-acid residues and thus destabilized the  
291 domain. When we performed experiments at the physiological  $\text{Ca}^{2+}$  concentration of 20  $\mu\text{M}$ , we  
292 could not detect a difference in domain unfolding between the mutant and wild-type proteins.

## 293 **Discussion**

294 The behavior of a gated ion channel is usually binary: the channel is open or closed. A  
295 mechanically activated channel can nevertheless signal fine nuances of a stimulus by rapidly  
296 fluttering between the two states, such that the average open probability provides a smoothly  
297 graded representation of the stimulus. A gating spring makes this possible: tensed by a stimulus  
298 and battered by thermal noise, the spring continuously adjusts the open probability of the  
299 associated channel over a significant range of inputs. This range is determined by the gating  
300 spring's stiffness, and thus by such molecular details as the entropic elasticity and folding  
301 transitions demonstrated here.

302 The stiffness of gating springs in outer hair cells increases with heightened resting tension  
303 along the tonotopic axis<sup>16</sup>, from 1.9  $\text{mN}\cdot\text{m}^{-1}$  at 7 pN of tension to 5.5  $\text{mN}\cdot\text{m}^{-1}$  for 50 pN.  
304 Simulations of short segments of tip-link proteins indicated that they are orders of magnitudes  
305 too stiff to account for these values<sup>7,8</sup>. However, our single-molecule experiments on the  
306 extracellular domain of PCDH15 reveal that the protein has a stiffness comparable to that of  
307 gating springs *in vivo* and displays similar strain-hardening. Across the physiological force range  
308 most of PCDH15's compliance is of entropic origin; the protein's enthalpic stiffness of 9  $\text{mN}\cdot\text{m}^{-1}$   
309 emerges only at very high tension. Our stiffness values (Figure 3) are systematically lower than  
310 those found for gating springs *in vivo*, which is not surprising because our measurements tested  
311 only a monomer of one constituent protein. The dimeric arrangement of PCDH15 roughly  
312 doubles the enthalpic stiffness of the monomer. Moreover, a tip link adopts a helical structure<sup>17,19</sup>  
313 that likely reduces the magnitude of its thermal undulations, decreasing the entropic  
314 contribution to the tip link's mechanics and further increasing its stiffness. Finally, the

315 arrangement of a dimer of CDH23 in series with the PCDH15 dimer is expected to reduce the  
316 stiffness by about 70 %. At very high tensions, when entropic effects are largely suppressed and  
317 enthalpy dominates, we estimate that the stiffness of the full-length, dimeric tip link is  $6 \text{ mN}\cdot\text{m}^{-1}$   
318 (Extended Data Note 3), a value in good agreement with the stiffness of strongly tensioned gating  
319 springs *in vivo*. These results suggest that the tip-link cadherins are a major component of the  
320 gating spring for mechanotransduction in hair cells.

321 The stiffness of hair bundles increases at low  $\text{Ca}^{2+}$  concentrations<sup>38</sup>, an observation that  
322 can now be interpreted as strain-hardening of the tip links. Low  $\text{Ca}^{2+}$  levels cause molecular  
323 motors to upregulate tip-link tension, which suppresses each link's thermal motion and increases  
324 its stiffness. In addition to this indirect modulation of tip-link stiffness by the  $\text{Ca}^{2+}$  concentration,  
325 we found that  $\text{Ca}^{2+}$  also directly affects the rate at which cadherin domains unfold under force.  
326 At a tension of 20 pN and at a  $\text{Ca}^{2+}$  concentration of 20  $\mu\text{M}$ , individual cadherin domains unfold  
327 an order of magnitude more slowly than in the absence of  $\text{Ca}^{2+}$ . We never observed the unfolding  
328 of entire cadherin domains at a  $\text{Ca}^{2+}$  concentration of 3 mM. The sensitivity of PCDH15 to  $\text{Ca}^{2+}$   
329 suggests that the variable concentrations of the ion in different receptor organs tunes the  
330 mechanical properties of tip links and thus of hair bundles to the organs' specific requirements.  
331 Even within a single organ, the guinea pig's cochlea, the  $\text{Ca}^{2+}$  concentration increases fourfold  
332 along the tonotopic axis from base to apex<sup>26</sup>. This gradient might adjust tip-link stiffness to accord  
333 with the frequency response of the individual hair cells. Finally, hair cells can enhance the local  
334  $\text{Ca}^{2+}$  concentration around their hair bundles through the activity of membrane  $\text{Ca}^{2+}$  pumps<sup>39</sup>.  
335 This phenomenon raises the interesting possibility that the stiffness of tip links is modulated by  
336 the locally varying  $\text{Ca}^{2+}$  concentration in response to hair-cell activity.

337 We found that the elastic properties of folded PCDH15 are surprisingly independent of  
338 the  $\text{Ca}^{2+}$  concentration. This result seems to contradict the impression conveyed by electron-  
339 microscopic images<sup>3</sup>, in which cadherins transition from a disordered globular conformation to a  
340 rod-like chain of domains in the presence of progressively larger amounts of  $\text{Ca}^{2+}$ . Disordered  
341 states should make larger entropic contributions to PCDH15's elasticity than ordered states, a

342 difference not apparent in our data. Note, however, that the divergence between electron-  
343 microscopic images and single-molecule data has also been observed for other proteins such as  
344 titin<sup>40</sup>. A possible explanation is that the configurations of proteins adsorbed to electron-  
345 microscopic substrates are far from their equilibrium conformations, so that the variations in  
346 shape do not accurately capture the thermal motion in solution<sup>41</sup>.

347         The force-extension relations of hair bundles reveal that, for unphysiologically large  
348 stimuli, gating springs can stretch<sup>42</sup> by at least 120 nm, a value thought to be incompatible with  
349 the extensibility of tip-link cadherins. It has consequently been suggested that the gating spring's  
350 stiffness stems from the elasticity of the plasma membrane or cytoskeleton into which the tip  
351 links insert<sup>43</sup>. We have shown that invoking such sources of elasticity is unnecessary: cadherin  
352 domains in the tip-link proteins can unfold under physiological stimuli, albeit at a low rate, and  
353 such unfolding events become very likely at high forces. Extension of the tip link by 120 nm is  
354 easily possible through the unfolding of several cadherin domains. In further support of domain  
355 unfolding, the length distribution of tip links in the bullfrog's hair bundles, as determined by  
356 electron-microscopic tomography, features two distinct classes<sup>13</sup> with means near 110 nm and  
357 170 nm. The unfolding of two cadherin domains per tip-link monomer could account for this  
358 length difference. Such unfolding events could soften the gating spring at high resting tensions  
359 and protect both the tip link and the associated mechanotransduction machinery from damage  
360 during loud sounds.

361         In addition to the unfolding of entire cadherin domains, we also observed partial domain  
362 unfolding with contour length increases of 4 nm and 15 nm. Future single-molecule work will be  
363 necessary to elucidate the structural correlates of these conformational changes and to  
364 determine what role they play in hearing. Additional experiments will also be necessary to test  
365 the stiffness of PCDH15 dimers and of the full tip link and to confirm that domain unfolding occurs  
366 for those constructs and for tip links *in vivo*.

367

368 **References**

- 369 1. Hudspeth, A. J. Integrating the active process of hair cells with cochlear function. *Nat. Rev.*  
370 *Neurosci.* **15**, 600–614 (2014).
- 371 2. Reichenbach, T. & Hudspeth, A. J. The physics of hearing: fluid mechanics and the active  
372 process of the inner ear. *Rep. Prog. Phys. Phys. Soc. G. B.* **77**, 076601 (2014).
- 373 3. Kazmierczak, P. *et al.* Cadherin 23 and protocadherin 15 interact to form tip-link filaments in  
374 sensory hair cells. *Nature* **449**, 87–91 (2007).
- 375 4. Corey, D. P. & Hudspeth, A. J. Kinetics of the receptor current in bullfrog saccular hair cells.  
376 *J. Neurosci. Off. J. Soc. Neurosci.* **3**, 962–976 (1983).
- 377 5. Pickles, J. O., Comis, S. D. & Osborne, M. P. Cross-links between stereocilia in the guinea pig  
378 organ of Corti, and their possible relation to sensory transduction. *Hear. Res.* **15**, 103–112  
379 (1984).
- 380 6. Assad, J. A., Shepherd, G. M. & Corey, D. P. Tip-link integrity and mechanical transduction  
381 in vertebrate hair cells. *Neuron* **7**, 985–994 (1991).
- 382 7. Sotomayor, M., Weihofen, W. A., Gaudet, R. & Corey, D. P. Structural determinants of  
383 cadherin-23 function in hearing and deafness. *Neuron* **66**, 85–100 (2010).
- 384 8. Sotomayor, M., Corey, D. P. & Schulten, K. In Search of the Hair-Cell Gating Spring.  
385 *Structure* **13**, 669–682 (2005).
- 386 9. Wiggins, P. & Phillips, R. Analytic models for mechanotransduction: Gating a  
387 mechanosensitive channel. *Proc. Natl. Acad. Sci.* **101**, 4071–4076 (2004).
- 388 10. Saotome, K. *et al.* Structure of the mechanically activated ion channel Piezo1. *Nature* **554**,  
389 481–486 (2018).
- 390 11. Zhao, Q. *et al.* Structure and mechanogating mechanism of the Piezo1 channel. *Nature* **554**,  
391 487–492 (2018).
- 392 12. Jin, P. *et al.* Electron cryo-microscopy structure of the mechanotransduction channel NOMPC.  
393 *Nature* **547**, 118–122 (2017).

- 394 13. Auer, M. *et al.* Three-dimensional architecture of hair-bundle linkages revealed by electron-  
395 microscopic tomography. *J. Assoc. Res. Otolaryngol. JARO* **9**, 215–224 (2008).
- 396 14. Sotomayor, M., Weihofen, W. A., Gaudet, R. & Corey, D. P. Structure of a force-conveying  
397 cadherin bond essential for inner-ear mechanotransduction. *Nature* **492**, 128–132 (2012).
- 398 15. Howard, J. & Hudspeth, A. J. Compliance of the hair bundle associated with gating of  
399 mechano-electrical transduction channels in the bullfrog's saccular hair cell. *Neuron* **1**, 189–  
400 199 (1988).
- 401 16. Tobin, M., Michel, V., Michalski, N., Martin, P. Tonotopy of the mammalian cochlea is  
402 associated with stiffness and tension gradients of the hair cell's tip-link complex (2018)  
403 doi.org/10.1101/497222.
- 404 17. Kachar, B., Parakkal, M., Kurc, M., Zhao, Y. & Gillespie, P. G. High-resolution structure of  
405 hair-cell tip links. *Proc. Natl. Acad. Sci. U. S. A.* **97**, 13336–13341 (2000).
- 406 18. Smith, S., Finzi, L. & Bustamante, C. Direct mechanical measurements of the elasticity of  
407 single DNA molecules by using magnetic beads. *Science* **258**, 1122–1126 (1992).
- 408 19. Dionne, G. *et al.* Mechanotransduction by PCDH15 Relies on a Novel cis-Dimeric  
409 Architecture. *Neuron* **99**, 480-492.e5 (2018).
- 410 20. Ge, J. *et al.* Structure of mouse protocadherin 15 of the stereocilia tip link in complex with  
411 LHFPL5. *eLife* **7**, (2018).
- 412 21. Pralle, A., Prummer, M., Florin, E.-L., Stelzer, E. H. K. & Hübner, J. K. H. Three-dimensional  
413 high-resolution particle tracking for optical tweezers by forward scattered light. *Microsc. Res.*  
414 *Tech.* **44**, 378–386 (1999).
- 415 22. Bartsch, T. F., Kochanzyk, M. D., Lissek, E. N., Lange, J. R. & Florin, E.-L. Nanoscopic  
416 imaging of thick heterogeneous soft-matter structures in aqueous solution. *Nat. Commun.* **7**,  
417 (2016).
- 418 23. Shapiro, L. *et al.* Structural basis of cell-cell adhesion by cadherins. *Nature* **374**, 327–337  
419 (1995).



- 420 24. Nagar, B., Overduin, M., Ikura, M. & Rini, J. M. Structural basis of calcium-induced E-  
421 cadherin rigidification and dimerization. *Nature* **380**, 360–364 (1996).
- 422 25. Boshier, S. K. & Warren, R. L. Very low calcium content of cochlear endolymph, an  
423 extracellular fluid. *Nature* **273**, 377–378 (1978).
- 424 26. Salt, A. N., Inamura, N., Thalmann, R. & Vora, A. Calcium gradients in inner ear endolymph.  
425 *Am. J. Otolaryngol.* **10**, 371–375 (1989).
- 426 27. Powers, R. E., Gaudet, R. & Sotomayor, M. A Partial Calcium-Free Linker Confers Flexibility  
427 to Inner-Ear Protocadherin-15. *Structure* **25**, 482–495 (2017).
- 428 28. Zhang, Y. & Dudko, O. K. A transformation for the mechanical fingerprints of complex  
429 biomolecular interactions. *Proc. Natl. Acad. Sci. U. S. A.* **110**, 16432–16437 (2013).
- 430 29. Jaramillo, F. & Hudspeth, A. J. Displacement-clamp measurement of the forces exerted by  
431 gating springs in the hair bundle. *Proc. Natl. Acad. Sci. U. S. A.* **90**, 1330–1334 (1993).
- 432 30. Marko, J. F. & Siggia, E. D. Fluctuations and supercoiling of DNA. *Science* **265**, 506–508  
433 (1994).
- 434 31. Ainaravapu, S. R. K. *et al.* Contour length and refolding rate of a small protein controlled by  
435 engineered disulfide bonds. *Biophys. J.* **92**, 225–233 (2007).
- 436 32. Oroz, J. *et al.* Nanomechanics of the Cadherin Ectodomain: “CANALIZATION” BY Ca<sup>2+</sup>  
437 BINDING RESULTS IN A NEW MECHANICAL ELEMENT. *J. Biol. Chem.* **286**, 9405–  
438 9418 (2011).
- 439 33. Chen, H. *et al.* Dynamics of equilibrium folding and unfolding transitions of titin  
440 immunoglobulin domain under constant forces. *J. Am. Chem. Soc.* **137**, 3540–3546 (2015).
- 441 34. Rubinstein, M. & Colby, R. H. *Polymer physics*. (Oxford University Press, 2003).
- 442 35. Marko, J. F. & Siggia, E. D. Stretching DNA. *Macromolecules* **28**, 8759–8770 (1995).
- 443 36. Jaiganesh, A. *et al.* Zooming in on Cadherin-23: Structural Diversity and Potential  
444 Mechanisms of Inherited Deafness. *Struct. Lond. Engl.* **1993** **26**, 1210-1225.e4 (2018).

- 445 37. Zhan, Y., Liu, M., Chen, D., Chen, K. & Jiang, H. Novel mutation located in EC7 domain of  
446 protocadherin-15 uncovered by targeted massively parallel sequencing in a family segregating  
447 non-syndromic deafness DFNB23. *Int. J. Pediatr. Otorhinolaryngol.* **79**, 983–986 (2015).
- 448 38. Marquis, R. E. & Hudspeth, A. J. Effects of extracellular Ca<sup>2+</sup> concentration on hair-bundle  
449 stiffness and gating-spring integrity in hair cells. *Proc. Natl. Acad. Sci. U. S. A.* **94**, 11923–  
450 11928 (1997).
- 451 39. Yamoah, E. N. *et al.* Plasma membrane Ca<sup>2+</sup>-ATPase extrudes Ca<sup>2+</sup> from hair cell stereocilia.  
452 *J. Neurosci. Off. J. Soc. Neurosci.* **18**, 610–624 (1998).
- 453 40. Leake, M. C., Wilson, D., Gautel, M. & Simmons, R. M. The Elasticity of Single Titin  
454 Molecules Using a Two-Bead Optical Tweezers Assay. *Biophys. J.* **87**, 1112–1135 (2004).
- 455 41. Broedersz, C. P. & MacKintosh, F. C. Modeling semiflexible polymer networks. *Rev. Mod.*  
456 *Phys.* **86**, 995–1036 (2014).
- 457 42. Shepherd, G. M. & Corey, D. P. The extent of adaptation in bullfrog saccular hair cells. *J.*  
458 *Neurosci. Off. J. Soc. Neurosci.* **14**, 6217–6229 (1994).
- 459 43. Powers, R. J. *et al.* Stereocilia membrane deformation: implications for the gating spring and  
460 mechanotransduction channel. *Biophys. J.* **102**, 201–210 (2012).
- 461 44. Bell, G. Models for the specific adhesion of cells to cells. *Science* **200**, 618–627 (1978).
- 462 45. Gibson, D. G. Enzymatic Assembly of Overlapping DNA Fragments. in *Methods in*  
463 *Enzymology* **498**, 349–361 (Elsevier, 2011).
- 464 46. Aricescu, A. R., Lu, W. & Jones, E. Y. A time- and cost-efficient system for high-level protein  
465 production in mammalian cells. *Acta Crystallogr. D Biol. Crystallogr.* **62**, 1243–1250 (2006).
- 466 47. Zakeri, B. *et al.* Peptide tag forming a rapid covalent bond to a protein, through engineering a  
467 bacterial adhesin. *Proc. Natl. Acad. Sci. U. S. A.* **109**, E690-697 (2012).
- 468 48. Pincet, F. & Husson, J. The Solution to the Streptavidin-Biotin Paradox: The Influence of  
469 History on the Strength of Single Molecular Bonds. *Biophys. J.* **89**, 4374–4381 (2005).
- 470 49. Zhu, M., Lerum, M. Z. & Chen, W. How To Prepare Reproducible, Homogeneous, and  
471 Hydrolytically Stable Aminosilane-Derived Layers on Silica. *Langmuir* **28**, 416–423 (2012).

- 472 50. Jahn, M. *et al.* The charged linker of the molecular chaperone Hsp90 modulates domain  
473 contacts and biological function. *Proc. Natl. Acad. Sci.* **111**, 17881–17886 (2014).
- 474 51. Swoboda, M. *et al.* Enzymatic Oxygen Scavenging for Photostability without pH Drop in  
475 Single-Molecule Experiments. *ACS Nano* **6**, 6364–6369 (2012).
- 476 52. Bartsch, T. F. *et al.* Detecting Sequential Bond Formation Using Three-Dimensional Thermal  
477 Fluctuation Analysis. *ChemPhysChem* **10**, 1541–1547 (2009).
- 478 53. Kochanczyk, M. D., Bartsch, T. F., Taute, K. M. & Florin, E.-L. Power spectral density  
479 integration analysis and its application to large bandwidth, high precision position  
480 measurements. in (eds. Dholakia, K. & Spalding, G. C.) 84580H (2012).  
481 doi:10.1117/12.929349
- 482 54. Neuman, K. C., Chadd, E. H., Liou, G. F., Bergman, K. & Block, S. M. Characterization of  
483 Photodamage to Escherichia coli in Optical Traps. *Biophys. J.* **77**, 2856–2863 (1999).
- 484 55. Tischer, C., Pralle, A. & Florin, E.-L. Determination and Correction of Position Detection  
485 Nonlinearity in Single Particle Tracking and Three-Dimensional Scanning Probe Microscopy.  
486 *Microsc. Microanal.* **10**, 425–434 (2004).
- 487 56. Monkos, K. Viscosity of bovine serum albumin aqueous solutions as a function of temperature  
488 and concentration. *Int. J. Biol. Macromol.* **18**, 61–68 (1996).
- 489 57. Berg-Sørensen, K. & Flyvbjerg, H. Power spectrum analysis for optical tweezers. *Rev. Sci.*  
490 *Instrum.* **75**, 594–612 (2004).
- 491 58. Block, S. M., Goldstein, L. S. B. & Schnapp, B. J. Bead movement by single kinesin molecules  
492 studied with optical tweezers. *Nature* **348**, 348–352 (1990).
- 493 59. Petrosyan, R. Improved approximations for some polymer extension models. *Rheol. Acta* **56**,  
494 21–26 (2017).
- 495 60. Rivas-Pardo, J. A. *et al.* Work Done by Titin Protein Folding Assists Muscle Contraction. *Cell*  
496 *Rep.* **14**, 1339–1347 (2016).
- 497 61. Elms, P. J., Chodera, J. D., Bustamante, C. & Marqusee, S. The molten globule state is  
498 unusually deformable under mechanical force. *Proc. Natl. Acad. Sci.* **109**, 3796–3801 (2012).

499 **Acknowledgments** The authors thank Julio Fernandez and Jaime Andrés Rivas-Pardo for  
500 guidance concerning the chemical functionalization of glass substrates; Brian Fabella and Vadim  
501 Sherman for high-precision fabrication; Brandon Razooky and Maria Vologodskiaia for assistance  
502 with cloning; and Anna Kaczynska for help with protein expression. This work was partially  
503 supported by a Junior Fellow award from the Simons Foundation and a Pilot Grant from the Kavli  
504 Foundation to T.F.B. A.J.H. is an Investigator of Howard Hughes Medical Institute.

505 **Author contributions** T.F.B. and A.J.H designed the project. T.F.B., F.E.H., A.O., S.S.M., M.E.S.,  
506 and U.M. created cDNA clones for PCDH15. G.D. and L.S. expressed and purified the recombinant  
507 protein. I.V.C., T.F.B., F.E.H., and A.O. prepared experimental substrates and samples. I.V.C.  
508 calibrated the  $\text{Ca}^{2+}$  concentrations. T.F.B. designed, built, developed software for, and  
509 characterized the photonic force microscope. T.F.B., F.E.H., and A.O. conducted the biophysical  
510 experiments. T.F.B. carried out the data fitting and analysis of statistical significance. T.F.B., I.V.C.,  
511 F.E.H., A.O, and A.J.H. wrote the paper.

512 **Competing interests** The authors declare no competing interests.

513

514 **Figure legends**

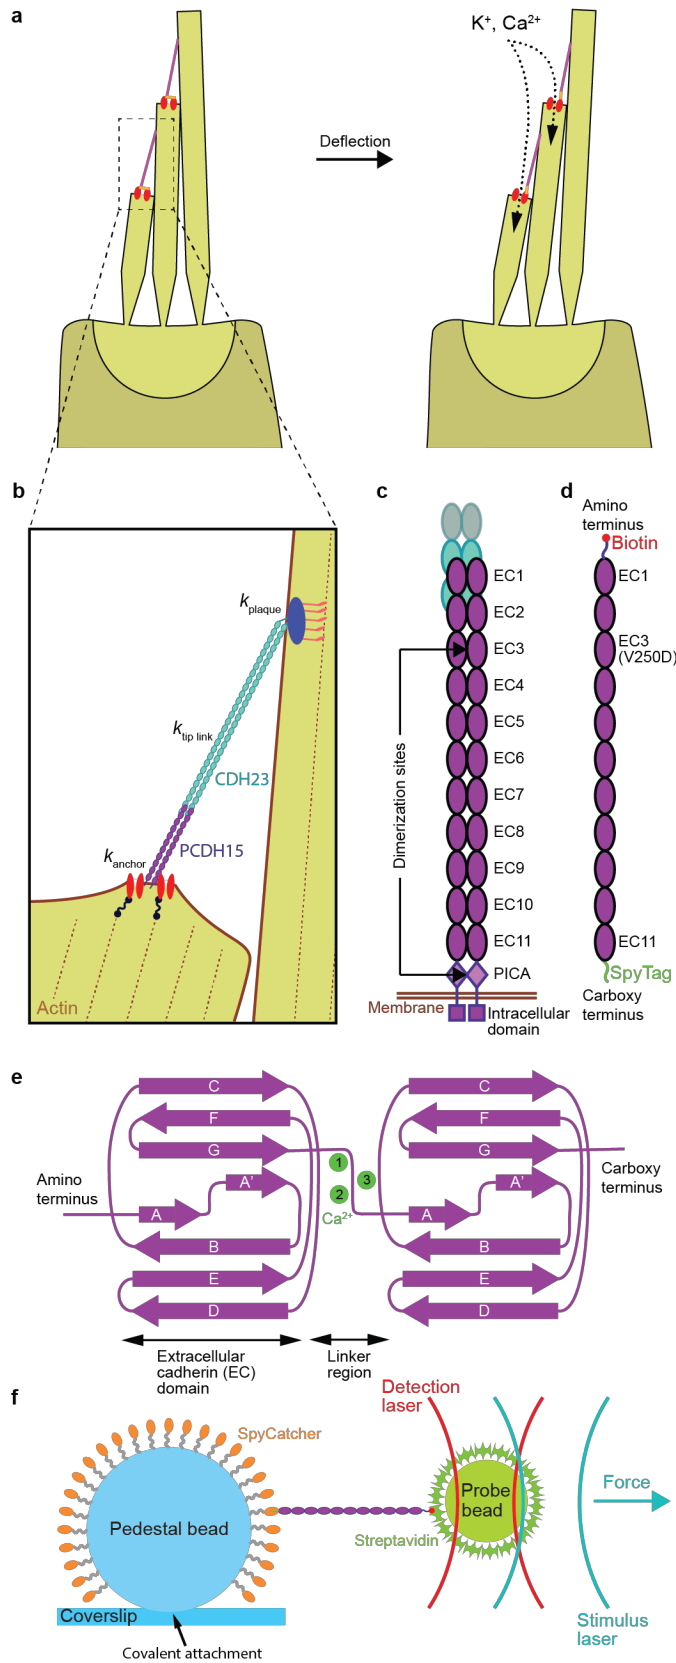

516 **Fig. 1 | The role of tip-link proteins in transduction by hair cells.** **a**, The hair bundle is a cluster  
517 of stiff, actin-filled protrusions called stereocilia that stands atop each hair cell in the inner ear.  
518 Each stereocilium is connected to its tallest adjacent neighbor through a proteinaceous filament  
519 called a tip link (pink), which is coupled at its base to mechanically gated ion channels (red).  
520 Deflection of a hair bundle increases the tension in the tip links, biasing the channels toward an  
521 open state that allows the influx of positively charged ions. **b**, The mechanical element that  
522 converts hair-bundle displacement into a force capable of opening the channels is called the  
523 gating spring. Its stiffness comprises those of the channel and its lower anchor ( $k_{\text{anchor}}$ ), the tip-  
524 link proteins PCDH15 and CDH23 ( $k_{\text{tip link}}$ ), and the insertional plaque that anchors the link's top  
525 end into the taller stereocilium ( $k_{\text{plaque}}$ ). **c**, The mechanical properties of the tip link emerge from  
526 its quaternary structure and from the characteristics of its constituent proteins. The lower third  
527 of the link consists of a dimer of PCDH15 molecules, each of which includes eleven extracellular  
528 cadherin (EC) domains. **d**, To measure the mechanical behavior of monomeric PCDH15, we  
529 tagged each end with a distinct molecular handle. We eliminated dimerization by a point  
530 mutation (V250D) in domain EC3 and by truncation of the PICA domain. **e**, The folding motifs of  
531 individual EC domains influence the mechanical properties of the full-length protein. Up to three  
532 calcium ions (green) can bind between domains. **f**, We probe the mechanics of a PCDH15  
533 monomer by confining it through its handles between an immobile, 2  $\mu\text{m}$  glass pedestal bead  
534 and a diffusive, 1  $\mu\text{m}$  plastic probe bead. To acquire each force-extension relation, we measure  
535 the position of the probe bead with a detection laser while applying a force with a stimulus laser.  
536

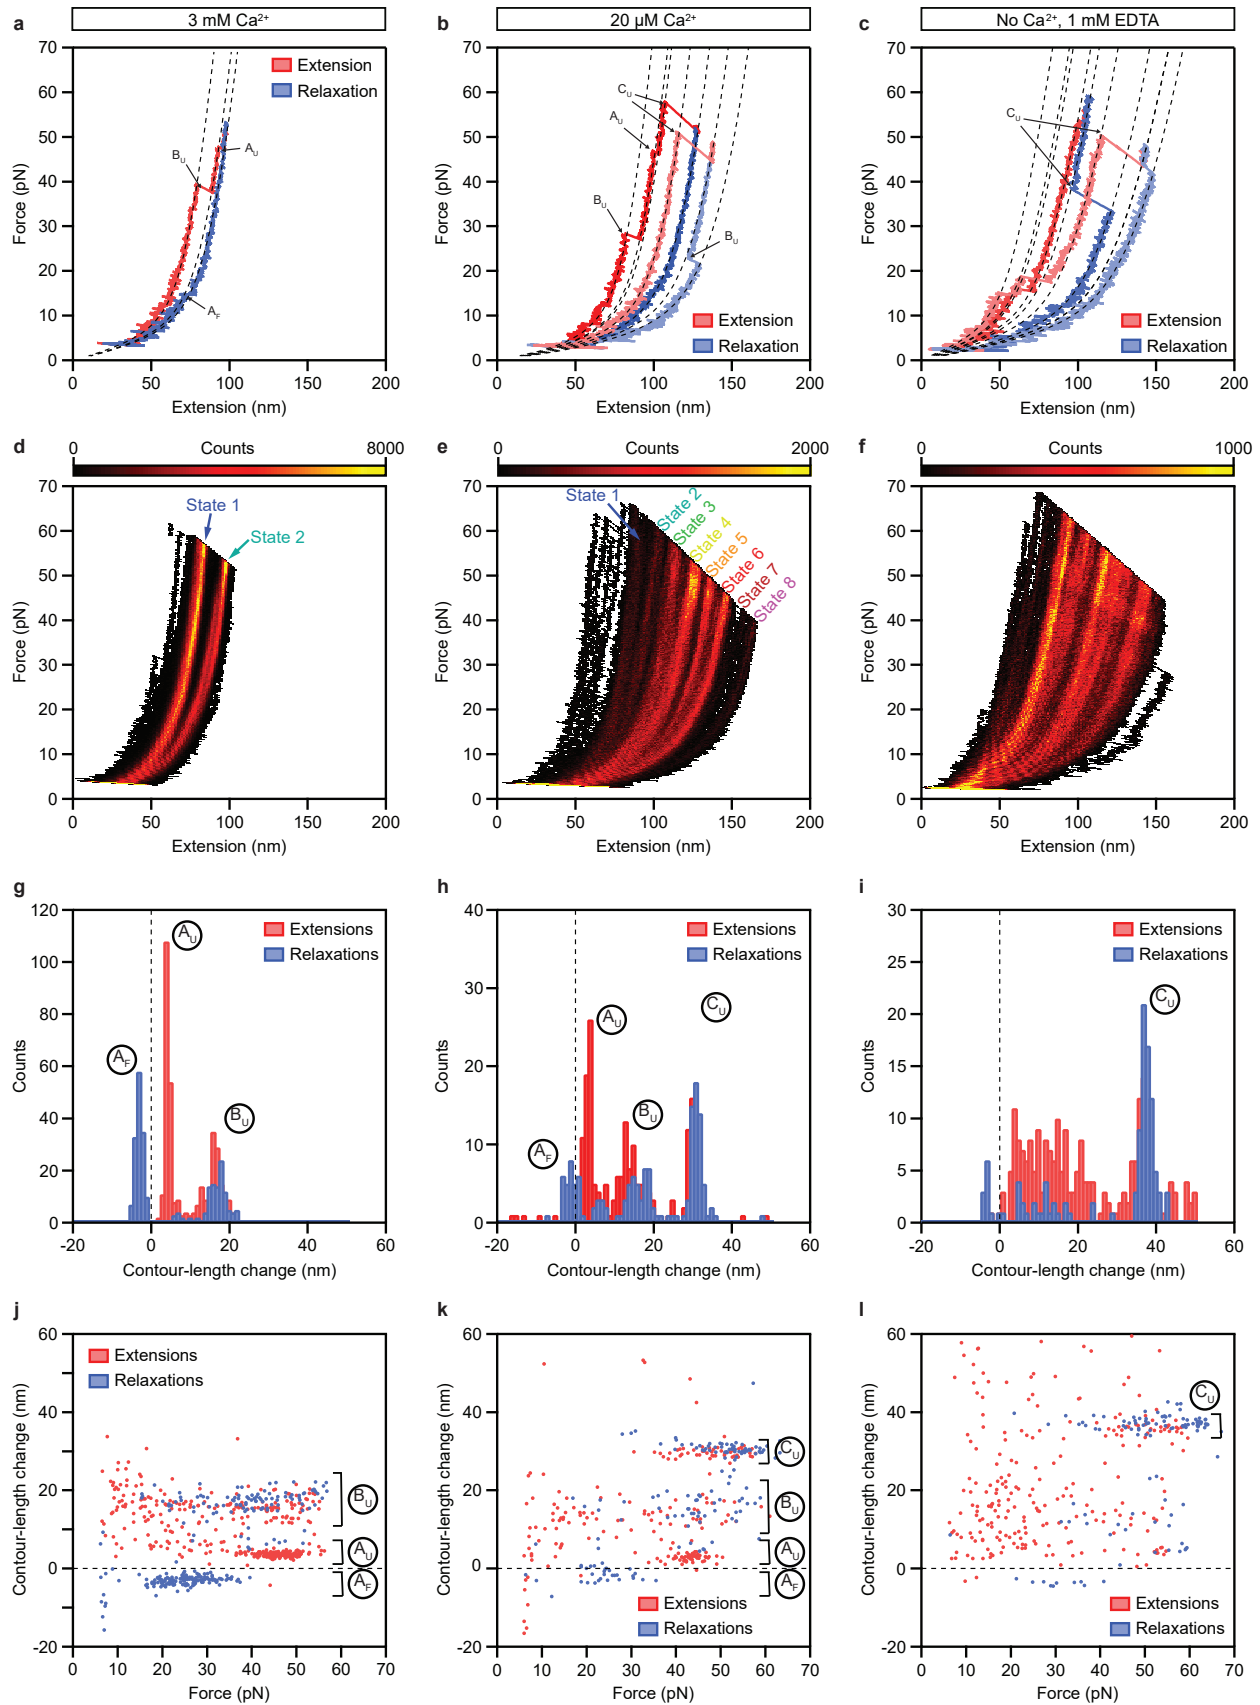

538 **Fig. 2 | Force-extension measurements of PCDH15 monomers. a,** At a  $\text{Ca}^{2+}$  concentration of  
539 3 mM, individual force-extension cycles show two distinct classes of abrupt elongations, the  
540 unfolding events  $A_U$  and  $B_U$ , as well as refolding events of class  $A_F$ . The dashed lines represent fits  
541 to the trajectories by a protein model. **b,** Reducing the  $\text{Ca}^{2+}$  concentration to 20  $\mu\text{M}$  elicits an  
542 additional class of unfolding events,  $C_U$ , corresponding to the unfolding of entire cadherin  
543 domains. **c,** In the absence of  $\text{Ca}^{2+}$ , unclassifiable structural changes occur in conjunction with the  
544 well-defined events  $C_U$ . **d-f,** A heatmap displays all the force-extension cycles for a single  
545 representative molecule at each  $\text{Ca}^{2+}$  concentration. The data were binned into pixels of  
546 1 nm x 0.1 pN. A much smaller portion of the state space is accessible for 3 mM  $[\text{Ca}^{2+}]$  than for  
547 20  $\mu\text{M}$   $[\text{Ca}^{2+}]$  or in the absence of  $\text{Ca}^{2+}$ . **g-i,** Histograms of the contour-length changes of all abrupt  
548 elongations verify that these rips can be grouped into classes  $A_F$ ,  $A_U$ ,  $B_U$ , and  $C_U$  at  $\text{Ca}^{2+}$   
549 concentrations of 3 mM and 20  $\mu\text{M}$ . In the absence of  $\text{Ca}^{2+}$ , most of the contour-length changes  
550 are more broadly distributed. **j-l,** Plots of the contour-length change of every rip against the force  
551 at which that event occurred reveal the force distributions of each class of structural change.  
552 Note that the extensions never completely unfolded a PCDH15 molecule, so elongations could  
553 occur even during the relaxation phases. All force-extension cycles were sampled at intervals of  
554 10  $\mu\text{s}$  and smoothed to a temporal resolution of 1 ms. The waiting times between cycles were  
555 0.2 s for 3 mM  $[\text{Ca}^{2+}]$ , 2 s for 20  $\mu\text{M}$   $[\text{Ca}^{2+}]$ , and 4 s in the absence of  $\text{Ca}^{2+}$ . The number of cycles  
556 recorded was 500 for 3 mM  $[\text{Ca}^{2+}]$  and 200 for 20  $\mu\text{M}$   $[\text{Ca}^{2+}]$  and in the absence of  $\text{Ca}^{2+}$ .  
557



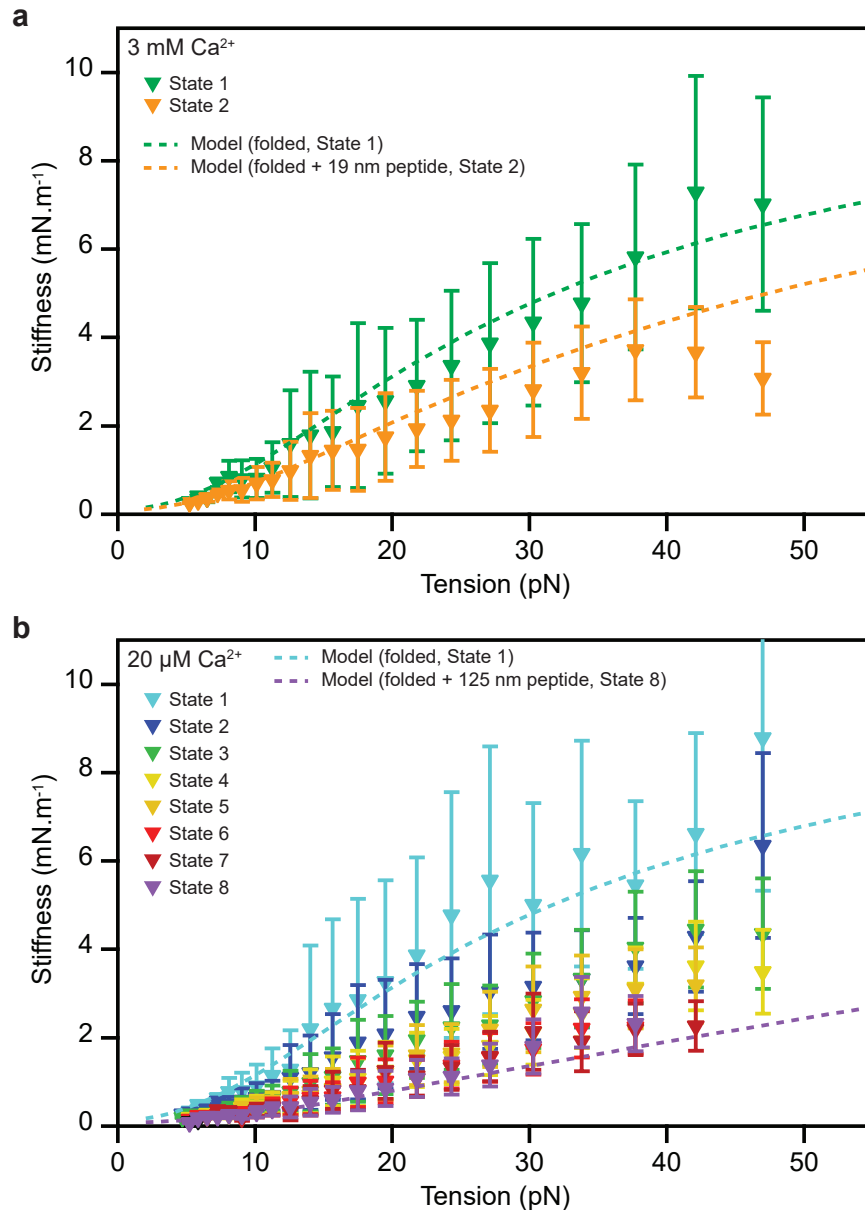

558

559 **Fig. 3 | Stiffness of monomeric PCDH15.** a, The stiffnesses of the different conformational states  
560 of PCDH15 at a Ca<sup>2+</sup> concentration of 3 mM correspond to the slopes of the highly occupied  
561 regions of the state space in Figure 2d,e and are corrected for the stiffness of the molecular tags  
562 and anchors. The green dashed line represents the stiffness of our model of State 1, the fully  
563 folded protein, with the parameter values of Table 1 ( $b = 3.0$  nm,  $l_{\text{clinker}} = 1.35$  nm,  
564  $k_{\text{folded}} = 10$  mN.m<sup>-1</sup>; parameter values were averaged over both Ca<sup>2+</sup> concentrations). The orange  
565 dashed line represents the model for State 2, with an additional 19 nm segment of unfolded

566 protein with a persistence length of 0.49 nm representing the combined effect of the events  $A_U$   
567 and  $B_U$ . **b**, The corresponding data for a  $Ca^{2+}$  concentration of 20  $\mu M$  capture a variety of  
568 unfolding events leading to States 2-8. The light-blue dashed line represents the fully folded  
569 protein (State 1); the purple dashed line depicts the stiffness of the protein in State 8, with an  
570 unstructured peptide 125 nm in length to represent the unfolding of three cadherin domains in  
571 series with contour-length changes of 15 nm and 4 nm. The experimental data are means  $\pm$  SEMs  
572 for five molecules and six molecules at a  $Ca^{2+}$  concentration of respectively 3 mM and 20  $\mu M$ .  
573

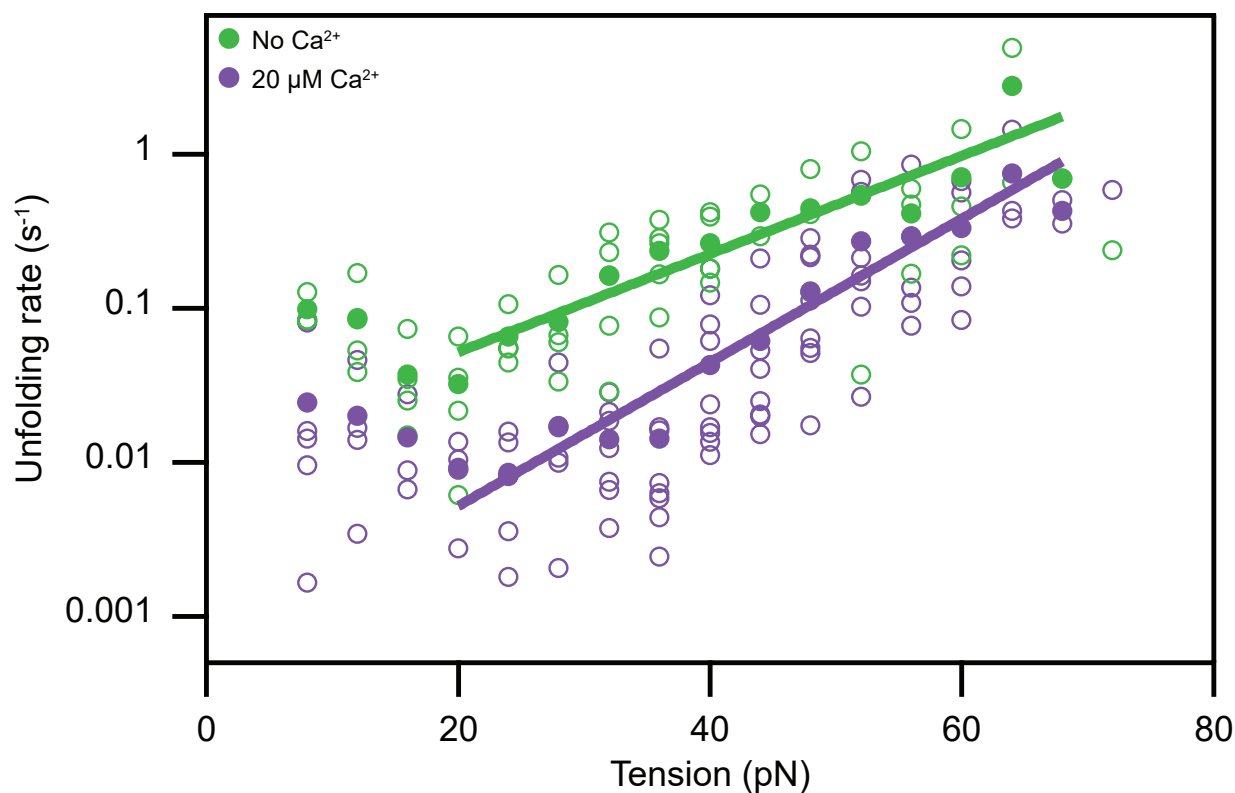

575 **Fig. 4 | Tension-dependent unfolding rates of a single cadherin domain. a,** Assuming that all  
576 domains of PCDH15 are similar and unfold independently, we estimate the rate at which  
577 individual EC domains unfold as a function of tension. Domains unfold much more readily in the  
578 absence of  $\text{Ca}^{2+}$  (green) than at a physiological  $\text{Ca}^{2+}$  concentration of  $20 \mu\text{M}$  (purple). The filled  
579 circles represent the means for eight molecules at  $20 \mu\text{M}$   $[\text{Ca}^{2+}]$  and for five molecules in the  
580 absence of  $\text{Ca}^{2+}$ . The outlined circles, which represent the data for individual molecules, provide  
581 an estimate of the data's spread. The solid lines are fits of Bells' model<sup>44</sup> to the data: for  $20 \mu\text{M}$   
582  $\text{Ca}^{2+}$ , the unfolding rate at zero force is  $k_0 = 0.0006 \pm 0.0002 \text{ s}^{-1}$  and the transition-state distance  
583 is  $x^\ddagger = 0.44 \pm 0.04 \text{ nm}$ ; in the absence of  $\text{Ca}^{2+}$ ,  $k_0 = 0.012 \pm 0.006 \text{ s}^{-1}$  and  $x^\ddagger = 0.30 \pm 0.04 \text{ nm}$ .  
584

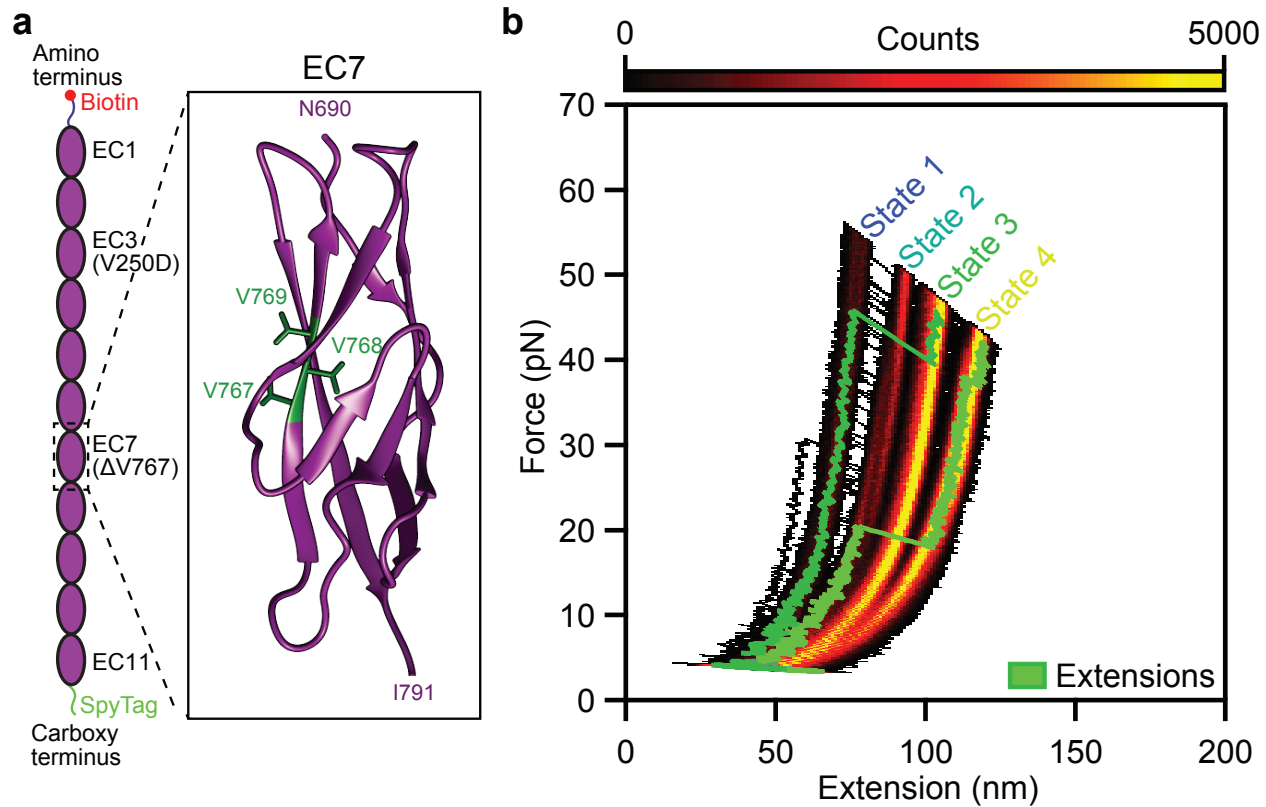

585

586 **Fig. 5 | Effect of a hearing loss-associated mutation on PCDH15 mechanics.** **a**, We deleted valine  
587 767 in the seventh EC domain of PCDH15. As indicated in the crystal structure (PDB ID code  
588 5W1D, image generated with UCSF Chimera), V767 is located in the F strand of the cadherin fold.  
589 **b**, A state-space heatmap for 500 extension-relaxation cycles reveals that at 3 mM  $[\text{Ca}^{2+}]$  the  
590 mutant protein can assume four distinct conformational states. The two additional states not  
591 observed in the wild-type protein result from unfolding of the pathologic cadherin domain in  
592 series with the usual States 1 and 2. Unfolding of the pathologic domain is rare and occurs in  
593 only a few cycles, two of which are superimposed upon the heat map (green traces). The waiting  
594 time between cycles was 0.2 s.  
595

596 **Table**

597 Table 1 – Material property values of PCDH15.

| [Ca <sup>2+</sup> ] | <i>b</i> (nm) | <i>l</i> <sub>Clinker</sub> (nm) | <i>k</i> <sub>folded</sub> (mN/m) | Δ <i>l</i> <sub>C<sub>A</sub></sub> (nm) | Δ <i>l</i> <sub>C<sub>B</sub></sub> (nm) | Δ <i>l</i> <sub>C<sub>C</sub></sub> (nm) |
|---------------------|---------------|----------------------------------|-----------------------------------|------------------------------------------|------------------------------------------|------------------------------------------|
| 3 mM                | 2.9 ± 0.5     | 1.4 ± 0.5                        | 9 ± 4                             | 4.0 ± 0.2                                | 15.8 ± 0.7                               | —                                        |
| 20 μM               | 3.1 ± 0.4     | 1.3 ± 0.5                        | 11 ± 5                            | 3.9 ± 0.4                                | 15.0 ± 0.6                               | 35 ± 1                                   |

598 Measurements are given as means ± SEMs for five experiments with 3 mM [Ca<sup>2+</sup>] and for eight  
599 experiments with 20 μM [Ca<sup>2+</sup>].

600

## 601 **Methods**

### 602 Molecular cloning

603 Plasmids were assembled by Gibson assembly in a one-step isothermal reaction using home-  
604 made master mixes<sup>45</sup>. We assembled in a pLEXm backbone<sup>46</sup> a construct encoding the protein  
605 **signal peptide-QYDDDWQYED-Avitag-GSGSGS-PCDH15(EC1-11, V250D)-GSGSGS-Spytag-6xHis**.  
606 The deletion mutant (V250D,  $\Delta$ V767) was assembled in a similar reaction. The PCDH15 sequence  
607 was isoform 1 from *Mus musculus* (UniProtKB entry Q99PJ1). The signal peptide comprises the  
608 native sequence that leads to secretion of PCDH15. Two tags for the site-specific confinement of  
609 PCDH15 were fused to the termini of the protein. The Avitag, with the sequence  
610 **GLNDIFEAQKIEWHE**, is recognized by a biotin ligase (BirA-500, Avidity, Aurora, CO, USA), which  
611 covalently biotinylates the lysine side chain. The SpyTag had the sequence **AHIVMVDAYKPTK**.  
612 The tags were attached to PCDH15 through flexible **GSGSGS** linkers.

### 613 Expression of recombinant PCDH15

614 All constructs were transfected with 40 kDa polyethyleneimine (Polysciences, Inc., Warrington,  
615 PA, USA) into suspension-adapted HEK293 cells (Freestyle , R79007, Thermo Fisher Scientific,  
616 Waltham, MA, USA). Seven to nine days post transfection, the medium was collected and  
617 secreted proteins were purified by Ni<sup>2+</sup>-affinity chromatography. Proteins were further purified  
618 by size-exclusion chromatography (Superose 6 10/300 GL,17517201, GE Healthcare Bio-Sciences,  
619 Pittsburgh, PA, USA) in 10 mM Tris, 150 mM NaCl, and 3 mM CaCl<sub>2</sub>. The purified proteins were  
620 concentrated to 1.5 mg/ml and biotinylated for 1 hr at 30 °C with biotin ligase (BirA 500, Avidity,  
621 Aurora, CO, USA). The samples were then used immediately or mixed with equal volumes of  
622 glycerol and stored at -20 °C for up to four months.

### 623 Design of the control linker peptide

624 In order to test the mechanical properties of the linkers and anchors of the assay in the absence  
625 of PCDH15, we fused the SpyTag and AviTag by a flexible **GGGSGGGS** linker to produce a control

626 linker peptide with the sequence **AHIVMVDAYKPTKGGGSGGGGSLNDIFEFAQKIEWHE** (Genscript,  
627 Piscataway, NJ, USA). After biotinylation, this peptide is capable of tethering streptavidin-coated  
628 probe beads to SpyCatcher molecules on pedestal beads, representing a control single-molecule  
629 assay that contains all components except for the PCDH15 protein.

### 630 Site-specific attachment of PCDH15 through short molecular anchors

631 The carboxy terminus of PCDH15 was modified with a SpyTag capable of forming a covalent bond  
632 with a small, globular protein called SpyCatcher, which was linked to the surface of the pedestal  
633 bead. The protein's amino terminus was biotinylated to allow its strong, site-specific attachment  
634 to streptavidin molecules on the probe bead (Figure 1d,f). The SpyCatcher-SpyTag complex is  
635 mechanically stable up to nanonewtons of force, well beyond the range relevant for hearing<sup>47</sup>.  
636 The streptavidin-biotin interaction has a lifetime of about 30 s for the highest forces applied in  
637 this work<sup>16,48</sup>. These properties made this set of tags and binding partners ideal for the site-  
638 specific confinement of proteins under force.

### 639 Conjugation of pedestal beads with SpyCatcher molecules

640 Cys-SpyCatcher molecules (EOX004, Kerafast, Boston, MA, USA) were conjugated to aminated  
641 silicon dioxide microspheres (140414-10, CorpuScular, Cold Spring, New York, USA) through  
642 short, bifunctional polyethylene glycol spacers. To deprotonate the surface amine groups, 200  $\mu$ l  
643 of the beads was washed once and resuspended for 1 hr at room temperature in 100  $\mu$ l of 50 mM  
644 sodium tetraborate buffer (11625, Sigma Aldrich, St Louis, MO, USA) at pH 8.5. Deprotonation is  
645 necessary for efficient covalent coupling of the *N*-hydroxysuccinimide-PEG<sub>12</sub>-maleimide spacer  
646 (22112, ThermoFisher, Waltham, Ma, USA), which we added to the beads to a final concentration  
647 of 50 mM of the linker and a final volume of 160  $\mu$ l. The resulting mixture was incubated for  
648 30 min at room temperature, washed three times with 1 ml of Hepes-buffered saline solution  
649 (HeBS; 20 mM Hepes and 100 mM NaCl), and after the final wash resuspended into 250  $\mu$ l of  
650 HeBS.

651           Meanwhile, 0.5 mg of Cys-SpyCatcher protein was dissolved in 50  $\mu$ l of HeBS and reduced  
652 for 1 hr with tris(2-carboxyethyl)phosphine (Immobilized TCEP Disulfide Reducing Gel, 77712,  
653 ThermoFisher Scientific, Waltham, MA, USA) according to the manufacturer's instructions. The  
654 reduced SpyCatcher protein was then mixed with 55  $\mu$ l of 100 mg/ml sulfhydryl-blocked bovine  
655 serum albumin (BSA; 100-10SB, Lee Biosolutions, Inc., Maryland Heights, MO, USA) in HeBS. The  
656 bead solution was injected into the protein mixture and incubated at 4 °C overnight to allow the  
657 covalent attachment of the SpyCatchers' unique cysteines to the maleimide residues on the  
658 pedestal bead. The beads were then washed three times with 1 ml of HeBS and resuspended to  
659 a volume of 100  $\mu$ l in HeBS. Any unreacted maleimide was quenched by addition of 100  $\mu$ l of 1 M  
660 L-cysteine (11033-016, Gibco BRL, Gaithersburg, MD, USA) in HeBS and incubation for 1 hr.  
661 Finally, the beads were washed three times and stored at 4° C in HeBS with 0.02 % sodium azide  
662 (71289, Sigma-Aldrich, St. Louis, MO, USA).

### 663 Covalent attachment of pedestal beads

664 We covalently attached pedestal beads through the surface amine groups of their SpyCatcher  
665 molecules to COOH-modified glass coverslips through carbodiimide crosslinking. Glass coverslips  
666 (12-545-81, Thermo Fisher Scientific, Waltham, MA, USA) were cleaned by sonication in ethanol  
667 for 15 min. After drying under a stream of oxygen, the coverslips were transferred to a solution  
668 of 1.5 g Nochromix (Godax Laboratories, Cabin John, MD, USA) in 60 ml sulfuric acid (A300S-500,  
669 Thermo Fisher Scientific, Waltham, MA, USA) and incubated for 3 hr. We then washed the  
670 coverslips three times with deionized water followed by three washes with ethanol. During each  
671 wash the coverslips were sonicated for five minutes in a bath sonicator. The slides were dried  
672 under a stream of oxygen gas and oxidized for 30 min in an ultraviolet ozone cleaner (PC440,  
673 Bioforce Nanosciences, Salt Lake City, UT, USA). In this step oxidation occurred on only one side  
674 of the coverslips, the “functional” side, which was used in all the subsequent steps.

675           We vapor-deposited an aminosilane layer onto the oxidized glass surfaces by placing the  
676 coverslips into a gas-tight glass container together with—but not submerged in—100  $\mu$ l of



677 (3-aminopropyl)trimethoxysilane (281778, Sigma Aldrich, Inc, St Louis, MO, USA) dissolved in  
678 10 ml of toluene (T324-1, Thermo Fisher Scientific, Waltham, MA, USA)<sup>49</sup>. The container was  
679 incubated overnight at 80 °C. Following the vapor deposition, the coverslips were washed three  
680 times in ethanol, dried, and placed into a solution of 50 mg succinic anhydride (S7626, Sigma  
681 Aldrich, St Louis, MO, USA) dissolved in 1 ml dimethyl sulfoxide (D4540, Sigma Aldrich, St Louis,  
682 MO, USA) and left to incubate at room temperature for at least 3 hr. This step converted the  
683 vapor-deposited amine groups into carboxyl groups and rendered the surface suitable for  
684 coupling. The carboxylated slides were then rinsed three times with ethanol and either used  
685 immediately or stored in ethanol for up to 72 hr.

#### 686 Assembly of samples

687 To assemble a sample, a carboxylated coverslip was dried and secured with vacuum grease onto  
688 a metal washer, so that its functional side contacted the washer (Extended Data Fig. 7). (1-ethyl-  
689 3-(3-dimethylaminopropyl)carbodiimide and *N*-hydroxysulfosuccinimide (respectively 77149 and  
690 24510, Thermo Fisher Scientific, Waltham, MA, USA) were equilibrated to room temperature  
691 before 10 mg of each reagent was dissolved in 1 ml of activation-buffer solution containing  
692 10 mM NaCl and 1 mM 2-(*N*-morpholino)ethanesulfonic acid (M3671, Sigma Aldrich, St Louis,  
693 MO, USA) at pH 6. Of the resulting solution, 50  $\mu$ l was pipetted onto the functional surface of the  
694 mounted slide and left to incubate at room temperature for exactly 30 min to activate the slides  
695 with amine-reactive hydroxysulfosuccinimide esters. To remove any excess reagents, we  
696 carefully washed the activated slide by pipetting 2 ml of HEPES-buffered saline solution with  $\text{Ca}^{2+}$   
697 (HeBS-Ca, 20 mM HEPES, 100 mM NaCl, 1 mM  $\text{CaCl}_2$ ) onto the mounted coverslip. Immediately  
698 after removing the solution except for a thin film to keep the active surface from drying, we  
699 pipetted pedestal beads in HeBS-Ca onto the activated surface and allowed to react for 2 hr.  
700 Mounting a second coverslip on the top of the washer closed the sample chamber. Access ports  
701 in the washer allowed the exchange of solutions within the chamber. To reduce non-specific  
702 interactions of PCDH15 with the beads, we exchanged the fluid to blocking-buffer solution

703 containing 10 mg/ml sulfhydryl-blocked bovine serum albumin (100-10SB, Lee Biosolutions, Inc.,  
704 Maryland Heights, MO, USA), 150 mM NaCl, 20 mM Tris-HCl, and 3 mM CaCl<sub>2</sub> at pH 8. The sample  
705 was stored overnight at 4 °C before addition of the PCDH15 molecules.

#### 706 Sample preparation

707 PCDH15 monomers were diluted into blocking-buffer solution and flushed into a sample  
708 chamber. The molecules were sufficiently dilute to ensure that any tether was likely with an  
709 average probability exceeding 90 % to represent a single molecule of PCDH15, rather than two  
710 or more at once (Extended Data Table 1). We incubated the sample for 1 hr at room temperature  
711 to allow the carboxy termini of the PCDH15 molecules, each fused to a SpyTag, to covalently bind  
712 to the SpyCatcher proteins on the surface of the pedestal beads. The biotinylated amino termini  
713 were then directed radially outward from the pedestal beads and thus available for coupling to  
714 streptavidin-coated probe beads. The sample was subsequently washed with copious amounts  
715 of blocking-buffer solution to remove any unbound PCDH15 monomers.

716 The blocking buffer was replaced with sample-buffer solution consisting of 20 mM Tris-  
717 HCl pH 7.5, 150 mM NaCl, and 10 mg/ml sulfhydryl-blocked bovine serum albumin (100-10SB,  
718 Lee Biosolutions, Inc., Maryland Heights, MO, USA). The solution contained probe beads  
719 (CP01004, Bangs Laboratories, Fishers, IN, USA); depending on the experiment, it included 3 mM  
720 CaCl<sub>2</sub>, 20 μM CaCl<sub>2</sub>, or 1 mM EDTA. To protect PCDH15 from photodamage, we employed an  
721 oxygen-scavenging system consisting of 18 mM D-glucose (G-5400, Sigma-Aldrich, St. Louis, MO,  
722 USA), 13 U/ml pyranose oxidase (P4234, Sigma Aldrich, St Louis, MO, USA), and 8500 U/ml  
723 catalase (219261, Millipore Sigma, Burlington, MA, USA)<sup>50,51</sup>.

#### 724 Calibration of Ca<sup>2+</sup> concentration

725 We used a fluorescence assay to confirm that the binding of Ca<sup>2+</sup> to BSA does not significantly  
726 alter the concentration of free Ca<sup>2+</sup> in sample-buffer solution (Extended Data Fig. 8). Using 3 μM  
727 of the fluorescent calcium indicator Fluo-5N (F14203, ThermoFisher Scientific, Waltham, MA,  
728 USA), we tested the fluorescence of the solution with and without 10 mg/ml BSA at various total

729  $\text{Ca}^{2+}$  concentrations. Our data show that BSA at this concentration does not noticeably change  
730 the concentration of free  $\text{Ca}^{2+}$ , whereas a very high BSA concentration, 100 mg/ml, sequesters a  
731 significant amount of  $\text{Ca}^{2+}$  (Extended Data Fig. 8b).

### 732 High-bandwidth and high-precision optical trapping and tracking

733 All data were acquired using a custom-built photonic-force microscope<sup>22</sup>, which in this instance  
734 was upright rather than inverted. The microscope could track the three-dimensional position of  
735 a weakly optically trapped, 1  $\mu\text{m}$ -diameter probe bead with an integration time of 1  $\mu\text{s}$ , sampled  
736 at a frequency of 100 kHz, with sub-nanometer precision. In brief, the position-sensing 1064 nm  
737 laser beam (Mephisto 500 mW, Coherent, CA, USA) was expanded and focused into the sample  
738 chamber through a high-numerical aperture water-immersion objective lens (UPlanSApo 60xW,  
739 Olympus, Tokyo, Japan). This beam formed a weak optical trap that confined the probe bead. We  
740 collected light forward-scattered by the probe bead together with the unscattered portion of the  
741 beam on a quadrant photodiode, where the two waves interfered. The signals of the four  
742 quadrants were related to the three-dimensional position of the bead in the optical trap<sup>21</sup>. The  
743 microscope's position error over one extension-relaxation cycle with a duration of 1 s was given  
744 by its position noise from 1 Hz to 1 MHz, for which we measured root-mean-square values of  
745 0.6 nm, 0.3 nm, and 0.4 nm along the x-, y-, and z-axes respectively<sup>52,53</sup>. Experiments were  
746 performed with the protein tether oriented along the y-axis, that with highest precision. Typical  
747 spring constants of the weak position-sensing trap were 6  $\mu\text{N}\cdot\text{m}^{-1}$ , 7.5  $\mu\text{N}\cdot\text{m}^{-1}$ , and 2  $\mu\text{N}\cdot\text{m}^{-1}$  along  
748 the x-, y-, and z-axes respectively. At very high stimulus forces of tens of piconewtons the probe  
749 bead was at its maximum extension of about 150 nm along the y-axis from the center of the  
750 position-sensing optical trap, corresponding to a maximum force generated by this trap of 1.1 pN.  
751 For lower stimulus forces and smaller extensions, the force was considerably less than 1 pN.  
752 Because the force generated by the position-sensing optical trap was very small compared to the  
753 stimulus force, we disregarded it in our analysis.

754 To record hundreds of cycles, we required observation times greater than a few seconds  
755 and therefore had to compensate the microscope's slight mechanical drift. The position of the  
756 sample relative to the optical traps was controlled by a nano-positioning stage (Nano-  
757 View/M375HS, Mad City Labs, WI, USA), whose position we adjusted to compensate for the drift  
758 (see below). With drift compensation in effect, the root-mean-square deviation measured along  
759 the y-axis between DC and 1 MHz during 5 min of observation was 2 nm.

760 In addition to the previously described position-sensing weak optical trap, we added a  
761 second optical trap to the system to apply force stimuli to the tethered proteins. We chose a  
762 wavelength of 852 nm (DL852-500, Crystalaser, Reno, NV, USA), which is near a local minimum  
763 of the action spectrum of photodamage to biological material<sup>54</sup>. Using a beam-steering lens  
764 mounted on a three-dimensional piezoelectric-block translator (P.282.30, Physik Instrumente,  
765 Auburn, MA, USA), we could shift the position of the stimulus trap with respect to the position-  
766 sensing trap with nanometer precision. Over 18 min of observation time, the average drift of the  
767 two optical traps relative to each other was  $3 \text{ pm}\cdot\text{s}^{-1}$ . The 852 nm laser beam traversed an electro-  
768 optical modulator (LM13, Excelitas Technologies, Fremont, CA, USA) placed between crossed  
769 polarizing beam-splitting cubes, which allowed us to modulate the intensity and thus the stiffness  
770 of the stimulus trap.

### 771 Drift compensation

772 Although we designed the microscope's frame to minimize thermal drifts of the sample chamber  
773 with respect to the optical traps, a small drift of about  $250 \text{ pm}\cdot\text{s}^{-1}$  remained<sup>22</sup>. To eliminate this  
774 drift, we implemented an active-feedback mechanism by using as a fiducial marker a second  
775 pedestal bead situated tens of micrometers from the pedestal to which a single molecule was  
776 tethered. The motion of the pedestal bead reflects the drift of the sample chamber with respect  
777 to the microscope frame. A camera (pco.edge 5.5, PCO, Kelheim, Germany) tracked the three-  
778 dimensional position of this pedestal bead at a frequency of 5 Hz. The pedestal's position signal  
779 was then used as the input of a proportional-integral-differential feedback loop that adjusted the

780 position of the nano-positioning stage to compensate for the sample's drift. To test the fidelity  
781 of this method, we immobilized a probe bead on a sample chamber's coverslip, positioned it at  
782 the focus of the position-sensing optical trap, and used the microscope to determine its position  
783 while drift compensation was active. We found that linear drifts were eliminated and that the  
784 root-mean-square variation of the position signal along the y-axis of 2 nm over 5 min remained.

#### 785 Calibration, linearization, and correction of the probe-position signal

786 The three-dimensional detector's non-linear response was linearized and calibrated *in situ* for  
787 each individual probe bead<sup>55</sup>. The calibration depended upon the viscosity of the buffer solution,  
788 which we corrected for the presence of 10 mg/ml bovine serum albumin as described<sup>56</sup>.

789 The probe bead forward-scattered a portion of the position-sensing laser beam, and we  
790 detected the bead's three-dimensional position by monitoring the interference pattern of the  
791 beam's scattered and unscattered light wave on a quadrant photodiode<sup>21</sup>. Scattering of a small  
792 amount of the beam by the pedestal bead produced an artifact in the signal<sup>22</sup> that was eliminated  
793 by the subtraction of a reference signal.

#### 794 Calibration and correction of the stimulus trap

795 Before each single-molecule experiment and for each individual probe bead, we measured the  
796 relation between the intensity of the stimulus laser and the stiffness of the stimulus trap. While  
797 monitoring the Brownian motion of the trapped probe bead with the position-sensing optical  
798 trap, we increased the power of the stimulus beam in 10 % increments. Fitting of the position  
799 signal's power spectral density for each intensity with a hydrodynamically correct theory<sup>57</sup>  
800 yielded the stiffness as a linear function of intensity. During our experiments, we sampled the  
801 intensity of the stimulus laser—and hence the trap's stiffness—with the same sampling rate as  
802 the position signal of the probe bead.

803 We adjusted the intensity of the stimulus laser using an electro-optical modulator. At high  
804 attenuation, close to extinction, the beam profile at the exit of the modulator deviated from a  
805 Gaussian function, which laterally shifted the position of the stimulus trap within the sample

806 chamber by a few nanometers. We recorded this shift during the calibration procedure for each  
807 probe bead and accounted for it when calculating the laser intensity-dependent force on the  
808 probe bead.

### 809 Initiation of single-molecule experiments

810 To initiate a single-molecule experiment, we optically trapped a probe bead deep in solution and  
811 calibrated the position sensor and the stiffnesses of both optical traps. We next positioned the  
812 bead's center at a height of 1  $\mu\text{m}$  from the functionalized coverslip, with its mean axial position  
813 at the equator of the attached pedestal beads. This height was determined by slowly moving the  
814 coverslip towards the optical trap until the probe bead's axial thermal motion began to be  
815 confined by the coverslip, then retracting the coverslip by an appropriate distance<sup>52</sup>.

816 The sample was moved laterally so that the probe bead was aligned along the y-axis with  
817 a pedestal bead. After recording a reference signal to account for light scattered by the pedestal  
818 we gently maneuvered the pedestal bead towards the optical trap until the probe's Brownian  
819 motion along the y-axis began to be restricted by the pedestal. When a PCDH15 molecule was  
820 present on the surface of the pedestal bead and within reach of the Brownian motion of the  
821 probe bead, a single molecule tether formed between the amino terminal biotin on the protein  
822 and a streptavidin molecule on the probe bead. The concentration of PCDH15 was titrated so  
823 that only a fraction of such approaches resulted in tether formation, on average giving rise to a  
824 90 % confidence of single-molecule conditions<sup>58</sup> (Extended Data Table 1). The position of the  
825 stimulus trap was then displaced by 200 nm along the y-axis. Before the force was lowered to the  
826 holding level, a brief increase in the intensity of the stimulus beam provided a force pulse of  
827 several tens of piconewtons to the tethered protein. This operation ensured that no portion of  
828 the protein was nonspecifically attached to either of the confining surfaces and that the full  
829 contour of the protein linked the two beads at the beginning of the extension-relaxation cycles.  
830 Force ramps were then applied to the tethered protein by repeatedly increasing and decreasing  
831 the intensity of the stimulus trap (Extended Data Fig. 1).

## 832 Control of non-specific attachments

833 For a successful single-molecule experiment it is imperative that the overwhelming majority of  
834 tethers between pedestal and probe beads constitutes PCDH15 molecules anchored at their  
835 amino and carboxy termini by respectively biotin and SpyTag: only a very small number of non-  
836 specific tethers should occur.

837 We tested whether streptavidin-coated probe beads would tether to SpyCatcher  
838 molecules on pedestal beads in the absence of PCDH15. Out of 65 attempts of initiating such  
839 non-specific tethering with two samples and four probe beads, only one bond formed, which  
840 ripped off immediately upon application of a stimulus force. We concluded that all stable tethers  
841 that we observed in our single-molecule experiments resulted from PCDH15 molecules or, in the  
842 case of control experiments to test the assay's mechanics, from linker-peptide constructs.

843 To exclude any non-specific interactions between PCDH15 and either of the beads, we  
844 next confirmed that these PCDH15 tethers formed only if both the SpyTag-SpyCatcher and biotin-  
845 streptavidin interactions were present. Pedestal beads were coupled to a coverslip and incubated  
846 with 0.15 mg/ml PCDH15 in blocking-buffer solution for 1 hr at room temperature to allow the  
847 proteins to react with the pedestals. The coverslip was then washed with copious amounts of  
848 blocking-buffer solution to remove any free PCDH15 molecules before the addition of a high  
849 concentration of probe beads in blocking-buffer solution. The probe beads were allowed to bind  
850 to the PCDH15 molecules on the pedestal beads for 1 hr before the coverslip was washed once  
851 more and then imaged.

852 As a positive control, with both sets of anchors intact, we found an average of 3.25 probe  
853 beads bound to each pedestal bead for the given reaction conditions (Extended Data Table 2). To  
854 test whether the carboxy-terminal SpyCatcher-SpyTag anchor participated in the tether, we  
855 generated pedestal beads without SpyCatcher and attempted to attach probe beads to them  
856 through PCDH15 molecules using the procedure described above. We found that tethering of  
857 probe beads was completely abolished in the absence of SpyCatcher, confirming that the

858 SpyCatcher-SpyTag interaction was an essential part of the formed tethers (Extended Data  
859 Table 2).

860 To determine whether the amino termini of our tethers were anchored to the probe  
861 beads through the biotin-streptavidin interaction, we attempted to tether probe beads to  
862 SpyCatcher-positive pedestals through PCDH15 molecules that had not been biotinylated. We  
863 again found that tether formation was completely abolished, confirming that the amino-terminal  
864 confinement in our single-molecule experiments occurred through the biotin-streptavidin  
865 interaction (Extended Data Table 2).

866 We concluded that our single-molecule assay was highly specific: molecular tethers  
867 formed in the presence of an appropriately tagged construct. If either of the pairs of anchors was  
868 disrupted, tether formation was completely abolished.

#### 869 Determination of the molecule's anchor position

870 The anchor position of the protein tether along the axis of extension was an important parameter  
871 that had to be determined before our protein model could be fit to the data. We determined this  
872 anchor position by analyzing the three-dimensional probability distribution of the motion of the  
873 tethered probe bead in the absence of externally applied tension. The pedestal bead appeared as  
874 a forbidden volume in the spatial probability distribution of the tethered probe bead, a so-called  
875 three-dimensional thermal-noise image<sup>22</sup>. The intersection of the surface of the pedestal bead  
876 with the axis of extension was defined as the anchor position of the tether.

#### 877 Sources of uncertainty

878 Our data are subject to several different sources of measurement uncertainty. In the following  
879 we refer to the variability within one single-molecule experiments as "precision," whereas we  
880 use "accuracy" to refer to the uncertainty between experiments.

881 The extension of a molecular tether could be measured with the same precision with  
882 which the photonic-force microscope could measure the position of the probe bead. To  
883 determine this value, we attached a probe bead to a glass coverslip, positioned it in the center



884 of the position-sensing optical trap, and activated the microscope's drift compensation. Between  
885 1 Hz and 1 MHz, the interferometric position signal of the immobilized probe had a band-limited  
886 standard deviation of 0.3 nm along the y-axis, the axis along which we extended single-molecule  
887 tethers (Extended Data Table 3a). Over 5 min of observation, the standard deviation for the full  
888 bandwidth of DC to 1 MHz was 2 nm (Extended Data Table 3b).

889 The accuracy of the position sensor depends on the fidelity of its calibration, which can  
890 be tested by its comparison to a calibrated standard. We confined a probe bead in the weak  
891 position-sensing optical trap, calibrated the position sensor, and then switched on the high-  
892 intensity stimulus trap. This trap was then displaced laterally with respect to the position-sensing  
893 trap so that the position sensor reported a displacement of 250 nm. We then compared this  
894 nominal displacement to that detected by a camera that acquired brightfield images of the focal  
895 plane. The camera had previously been calibrated to accord with well-defined displacements of  
896 the nano-positioning stage. Across twelve probe beads, the camera read out an average  
897 displacement of  $250 \pm 13$  nm (mean  $\pm$  SD), values that were in excellent agreement with the  
898 microscope's position sensor. We concluded that the bead-to-bead variability of the calibration  
899 was 5 % (Extended Data Table 3c). Because the radius of the probe bead was the parameter with  
900 the greatest uncertainty during the calibration procedure, this value also set an upper bound of  
901 5 % on the coefficient of variation of the diameter of our probe beads.

902 The pedestal bead scattered a small portion of the position sensing beam, which led to  
903 an offset of the position signal that was dependent on the pedestal's position. Although we  
904 corrected for this effect through a reference signal, there remained a position offset of  $\pm 4$  nm  
905 peak-to-peak or 3 nm root-mean-square. This problem contributed uncertainty to the measured  
906 displacement between the position-sensing trap and the stimulus trap and thus resulted in  
907 reduced accuracy (Extended Data Table 3d). The total accuracy of a nominal distance of 200 nm  
908 between the position-sensing trap and stimulus trap was then 10 nm root-mean-square  
909 (Extended Data Table 3e). During a single-molecule experiment, the precision of this distance was

910 impacted by the slow relative drift between the two optical traps, which we measured as  $3 \text{ pm}\cdot\text{s}^{-1}$   
911 (Extended Data Table 3f).

912 Because the spring constant of the stimulus trap depended linearly on the intensity of the  
913 stimulus beam, any variation in the beam's intensity decreased the precision of the spring  
914 constant. The spring constant's root-mean-square noise was  $0.27 \text{ }\mu\text{N}\cdot\text{m}^{-1}$  over 20 s with a  
915 vanishingly small drift (Extended Data Table 3g,h). We computed the spring constant from the  
916 power-spectral density of the motion of a probe bead as<sup>57</sup>  $k = 2\pi\gamma f_c$ . The error of the drag  $\gamma$   
917 was determined by the uncertainty of the probe bead's radius (5 %) and exceeded the error of  
918 the corner frequency  $f_c$ . Depending on the radius of the probe bead, the spring constant of the  
919 stimulus trap was therefore accurate to within 5 % of the calibrated value (Extended Data  
920 Table 3i).

921 We determined the force on the trapped probe bead as the product of its extension from  
922 the stimulus trap and the trap's stiffness. Consequently, the precision of the force could be  
923 determined from the probe's position noise, the drift of the stimulus trap, and the noise of the  
924 trap's spring constant. With the probe bead displaced by 200 nm from the stimulus trap and for  
925 maximal power of the stimulus laser, we determined a precision of 0.7 pN over 5 min of data  
926 acquisition (Extended Data Table 3j). During an experiment the displacement of the probe and  
927 the power of the laser were usually smaller than those values, resulting in a smaller uncertainty.  
928 The accuracy of the force was determined by the total accuracy of the position of the stimulus  
929 trap and that of the spring constant. At maximal power of the stimulus laser and for a  
930 displacement of the probe bead from the stimulus trap of 200 nm, we found an experiment-to-  
931 experiment uncertainty of the force of 3.8 pN (Extended Data Table 3k). For smaller  
932 displacements and lower laser powers this uncertainty was lower.

### 933 Polymer model

934 We modeled PCDH15 as a freely-jointed chain with  $N = 11$  segments, each of length  $b$ ,  
935 representing the eleven stiff cadherin domains<sup>34</sup>. The model included in series a worm-like  
936 chain<sup>35,59</sup> characterized by a persistence length  $l_{p\text{peptide}}$  and a contour length  $l_{\text{Clinkers,total}} = 10 l_{\text{Clinker}}$ ,

937 which accounted for the ten flexible disordered linker regions between the stiff domains. Any  
 938 enthalpic extensibility of the protein was described by a Hookean spring with stiffness  $k_{\text{folded}}$   
 939 (Extended Data Fig. 5). Elongation of the protein through the unfolding of each domain was  
 940 described by the addition of another worm-like chain. Because unfolded polypeptide chains are  
 941 structurally similar to the inter-domain linker regions, the unfolded portions of the protein were  
 942 described with an identical persistence length and a contour length of  $lc_{\text{unfolded}}$ .

943 The extension-force relation of the protein was described by the sum of the extension-  
 944 force relations of the freely-jointed chain and of the worm-like chains,

$$945 \quad x_{\text{protein}}(F) = x_{\text{FJC}}(F, N, b, k_{\text{folded}}) + x_{\text{WLC}}(F, lp_{\text{peptide}}, lc_{\text{linkers, total}}, k = \infty) +$$

$$946 \quad x_{\text{WLC}}(F, lp_{\text{peptide}}, lc_{\text{unfolded}}, k = \infty). \quad 1$$

947 in which the elastic properties of the two worm-like chains were purely entropic ( $k = \infty$ ). The  
 948 extension-force relation of an extensible freely-jointed chain is given by<sup>34</sup>

$$949 \quad x_{\text{FJC}}(F, N, b, k) = N b \left( \coth\left(\frac{F b}{k_B T}\right) - \frac{k_B T}{F b} \right) + \frac{F}{k}, \quad 2$$

950 whereas the elongation of an extensible worm-like chain under force is well approximated by<sup>59</sup>

$$951 \quad x_{\text{WLC}}(F, lp, lc, k) = lc \left( \frac{4}{3} - \frac{4}{3 \sqrt{\frac{F lp}{k_B T} + 1}} - \frac{10 \exp\left(\left(\frac{900 k_B T}{F lp}\right)^{\frac{1}{4}}\right)}{\sqrt{\frac{F lp}{k_B T}} \left(\exp\left(\left(\frac{900 k_B T}{F lp}\right)^{\frac{1}{4}}\right) - 1\right)^2} + \frac{\left(\frac{F lp}{k_B T}\right)^{1.62}}{3.55 + 3.8 \left(\frac{F lp}{k_B T}\right)^{2.2}} \right) + \frac{F}{k}. \quad 3$$

952 When a force was applied to a single-molecule tether, not only did the tether stretch, but  
 953 so did the system's remaining elastic elements, the anchors and linkers in series with the tether  
 954 (Extended Data Fig. 9). We demonstrated experimentally that the combined mechanics of the  
 955 assay without PCDH15 could be described by an additional extensible worm-like chain (Extended  
 956 Data Fig. 10), for which we found across nine experiments an average persistence length  
 957  $lp_{\text{anchors}} = 0.5 \pm 0.1$  nm, contour length  $lc_{\text{anchors}} = 37 \pm 4$  nm, and Hookean spring constant  
 958  $k_{\text{anchors}} = 7.2 \pm 1.3$  mNm<sup>-1</sup> (means  $\pm$  SEMs).

959 The total polymer model that we fitted to our data was therefore given by

$$960 \quad x_{\text{polymer}}(F, N, b, k_{\text{folded}}, lp_{\text{peptide}}, lc_{\text{linkers, total}}, lc_{\text{unfolded}}, lp_{\text{anchors}}, lc_{\text{anchors}}, k_{\text{anchors}})$$

$$961 \quad = x_{\text{protein}}(F, N, b, k_{\text{folded}}, lp_{\text{peptide}}, lc_{\text{linkers, total}}, lc_{\text{unfolded}}) +$$

962  $x_{\text{WLC}}(F, l_{p_{\text{anchors}}}, l_{c_{\text{anchors}}}, k_{\text{anchors}}).$  4

963 Determination of the stiffness of PCDH15 and influence of molecular anchors and beads  
964 on the measured stiffness

965 Our force-extension relations capture the mechanics of PCDH15 in series with its molecular  
966 anchors and with any compliance of the probe and pedestal beads (Extended Data Fig. 9). To  
967 determine the contribution of these elements to our measurements, we conducted experiments  
968 without PCDH15 by fusing the amino- and carboxy-terminal anchors and testing their elastic  
969 properties in series with the pedestal and probe beads (Extended Data Fig. 10). PCDH15's  
970 stiffness could then be determined by treating the whole system as a series of nonlinear springs,

971 
$$k_{\text{PCDH15}}(F) = \frac{k_{\text{total}}(F) \cdot k_{\text{anchors}}(F)}{k_{\text{anchors}}(F) - k_{\text{total}}(F)}.$$
 5

972  
973 For  $\text{Ca}^{2+}$  concentrations of 3 mM and 20  $\mu\text{M}$ , we computed the stiffness of the full-length  
974 construct—the protein in series with its anchors and the beads—as the spatial derivative of the  
975 mean of the force-extension relations associated with its different conformational states  
976 (Extended Data Fig. 11). Computed in an analogous way (Extended Data Fig. 10d), the stiffness of  
977 the construct without PCDH15 was much larger (Extended Data Fig. 11c,d). From the values of  
978 State 1 we computed the stiffness of folded PCDH15 and found that it is surprisingly soft under  
979 physiological tensions, offering a stiffness between 0.5  $\text{mN}\cdot\text{m}^{-1}$  at a tension of 5 pN and 6  $\text{mN}\cdot\text{m}^{-1}$   
980 at 50 pN (Figure 3a,b).

981 Detection of structural changes and fitting of data

982 The position and force signals (Extended Data Fig 1b,c), sampled at 100 kHz, were split into  
983 individual extension-relaxation cycles and smoothed with a second order Savitzky-Golay filter  
984 over a window of 101 points, which reduced the temporal resolution to 1 ms. Conformational  
985 changes of the protein were automatically detected as sudden increases or decreases in the  
986 filtered probe-position signal. To determine whether a structural change occurred at point  $i$  of

987 the time trace, we computed the averages and standard deviations of 1000 points preceding and  
988 succeeding  $i$ ,  $\langle x \rangle_{\text{left}}$ ,  $\langle x \rangle_{\text{right}}$ ,  $\sigma_{\text{left}}$ , and  $\sigma_{\text{right}}$ . A structural change was detected at point  $i$  if

989 
$$|\langle x \rangle_{\text{left}} - \langle x \rangle_{\text{right}}| > 4 \frac{\sigma_{\text{left}} + \sigma_{\text{right}}}{2}. \quad 6$$

990 Structural changes that did not fulfill this criterion were missed by our algorithm. If two or more  
991 structural changes occurred within 10 ms of one another, our algorithm detected only one larger  
992 event.

993 We then segmented each extension-relaxation cycle into its individual states, demarcated  
994 by the structural changes, and fit our polymer model to each of the segments. To facilitate  
995 meaningful fits, we sought to constrain the number of free parameters in our polymer model  
996 (Equation 4) as much as possible. We first independently measured the parameter values of the  
997 worm-like chain describing the compliance of the anchors and of the rest of the assay without  
998 PCDH15 (Extended Data Figs. 9 and 10), for which we found an average persistence length  
999  $l_{p_{\text{anchors}}} = 0.5 \pm 0.1$  nm, contour length  $l_{c_{\text{anchors}}} = 37 \pm 4$  nm, and Hookean spring constant  
1000  $k_{\text{anchors}} = 7.2 \pm 1.3$  mNm<sup>-1</sup> (means  $\pm$  SEMs of nine experiments). We held these values constant at  
1001 their means for all subsequent fits of extension-relaxation cycles of PCDH15.

1002 In a next step it was important to determine  $l_{p_{\text{peptide}}}$ , the persistence length of PCDH15's  
1003 unfolded polypeptide chains, for this value entangles the mechanics of State 1 (through the linker  
1004 regions of the folded protein) with the mechanics of partially unfolded PCDH15. To facilitate this  
1005 determination, we temporarily approximated State 1 of the protein as a worm-like chain; we  
1006 then held the parameter values of State 1's worm-like chain model constant while fitting all  
1007 extension-relaxation cycles with only  $l_{p_{\text{peptide}}}$  and  $l_{c_{\text{unfolded}}}$  as free parameters, determining  
1008  $l_{p_{\text{peptide}}} = 0.49 \pm 0.04$  (mean  $\pm$  SEM,  $N = 13$ ). Because there was no apparent difference in peptide  
1009 persistence length between the results for Ca<sup>2+</sup> concentrations of 3 mM and 20  $\mu$ M, data were  
1010 averaged across 13 experiments at both concentrations. This value of  $l_{p_{\text{peptide}}}$  was held constant  
1011 at its mean for all subsequent fits.

1012 We then fitted State 1 with our protein model to determine the remaining free  
1013 parameters of the folded protein,  $l_{c_{\text{linker}}}$ ,  $b$ , and  $k_{\text{folded}}$  (Table 1). Finally, we fitted all segments of

1014 all extension-relaxation cycles with the polymer model, with  $l_{\text{linker}}$ ,  $b$ , and  $k_{\text{folded}}$  held constant at  
1015 the values determined for the individual proteins, with  $l_{\text{unfolded}}$  as the only free parameter. The  
1016 changes of  $l_{\text{unfolded}}$  between adjacent segments then described the end-to-end elongation of the  
1017 tether due to unfolding events (Fig. 2).

1018 Statistical dependence of events  $A_U$  and  $B_U$

1019 In order to test whether the order of occurrence of events  $A_U$  and  $B_U$  is statistically significant,  
1020 we simulated extension trials with independent probability densities for the two events such that  
1021 the resulting force distributions for each of the classes of rips was identical to our experiments.  
1022 We then showed that the sequence of events in these simulations did not match our  
1023 experimental observations, proving that the probability densities underlying our experiments are  
1024 statistically dependent.

1025 For every simulated trial, we first drew two random numbers to determine whether both  
1026 rips would occur during the extension. The probabilities  $p_A$  and  $p_B$  for respective events  $A_U$  and  
1027  $B_U$  were determined separately from the experimental data for each PCDH15 molecule. For  
1028 traces that contained both rips, a parameter representing the pulling force was then linearly  
1029 increased from 0 pN to 80 pN in steps  $dF = 0.1$  pN. After each force increment we allowed rips  $A_U$   
1030 and  $B_U$  to occur with independent probabilities  $\rho_A(F) dF$  and  $\rho_B(F) dF$ , in which  $\rho_{A,B}$  represent  
1031 probability densities. Because each class of rips represents a unique structural change, once a rip  
1032 of either type had occurred no further event of that class could follow. The simulated record was  
1033 discarded if neither or only one of the rips occurred over the simulated force range. The  
1034 probability densities  $\rho_{A,B}(F)$  were independently determined for each protein and could be  
1035 calculated from the experimentally observed force histograms of rips  $N_{A,B}(F)$ :

1036 
$$N_{A,B}(F) = \rho_{A,B}(F) dF \cdot \left( 1 - \int_0^F \rho_{A,B}(F') dF' \right) \cdot N \cdot p_{A,B}$$

1037 in which  $\rho_{A,B}(F) dF$  is the probability of finding rip  $A_U$  (or  $B_U$ ) at force  $F$  and  $N \cdot p_{A,B}$  is the number  
1038 of extension trials that contain rip  $A_U$  (or  $B_U$ ). The factor in parentheses is the probability that at

1039 force  $F$  during an extension a rip has not yet occurred at forces lower than  $F$ . This factor accounts  
1040 for the fact that we draw from  $\rho_{A,B}(F)$  for linearly increasing  $F$ , and stop drawing from the  
1041 distribution when a rip occurs. We accordingly can draw from  $\rho_{A,B}(F)$  only if no other rip  
1042 occurred at a lower force. It follows that

$$1043 \quad \rho_{A,B}(F) = \rho_{0\ A,B}(F) + \rho_{A,B}(F) \int_0^F \rho_{A,B}(F') dF'$$

1044 in which  $\rho_{0\ A,B}(F) = \frac{N_{A,B}(F)}{N \cdot p_{A,B} \cdot dF}$  are the normalized force histograms of the experimentally observed  
1045 rips. We numerically solved this relation to determine  $\rho_{A,B}(F)$  (Extended Data Fig. 12a,c).

1046 Our simulations successfully reproduced the experimentally observed force histograms  
1047 of the rips  $A_U$  and  $B_U$  (Extended Data Fig. 12b,d). We then enumerated the trials in which rip  $A_U$   
1048 occurred before rip  $B_U$ . For the molecule shown in the left column of Figure 2, our simulations—  
1049 based on the independent probability distributions  $\rho_A(F)$  and  $\rho_B(F)$ —predicted that we should  
1050 have observed 20.4 extensions in which  $A_U$  preceded  $B_U$ , a contradiction to the observed value  
1051 of 8 ( $p < 0.05$ ). Because the counts were assumed to be Poisson distributed, we made statistical  
1052 comparisons by computing the Wald test statistic  $Z = \frac{N_o - N_p}{\sqrt{N_o + N_p}}$ , in which  $N_o$  are the observed  
1053 counts and  $N_p$  are the predicted counts, followed by a two-tailed comparison of  $Z$  to a normal  
1054 distribution to compute the  $p$ -value. We therefore reject the assumption that  $A_U$  and  $B_U$  are  
1055 independent. An identical conclusion was reached for all five proteins tested at a  $\text{Ca}^{2+}$   
1056 concentration of 3 mM, although two were significant only at  $p < 0.1$ . When we tested proteins  
1057 at 20  $\mu\text{M}$   $[\text{Ca}^{2+}]$  in the same manner, we again routinely observed fewer trials in which rip  $A_U$   
1058 occurred before rip  $B_U$  than predicted by our simulations. At this physiological  $\text{Ca}^{2+}$  concentration,  
1059 however, the difference between the observed and expected number of sequences AB was no  
1060 longer statistically significant at  $p < 0.1$ .

## 1061 Transformation of force histograms into force-dependent rate constants

1062 We transformed the measured distribution of rip forces of type  $C_U$  into force-dependent  
1063 unfolding rate constants<sup>28</sup>. PCDH15 consists of 11 domains that we approximated as equivalent  
1064 for this analysis. In this approximation, they are each assumed to be equally likely to unfold under

1065 force. Hence, a fully folded PCDH15 molecule is eleven times more likely to unfold a domain than  
1066 a PCDH15 molecule with only one folded domain. To arrive at correct values for the unfolding  
1067 rates of individual cadherin domains, we therefore computed individual force histograms of  $C_U$   
1068 events originating from each of the states of the protein. We then weighted the measured force  
1069 histograms with the number of folded cadherin domains in each state: for example, the force  
1070 histogram for domain unfolding from States 1 and 2, which both correspond to PCDH15 with  
1071 eleven (at least partially) folded cadherin domains, was divided by  $n = 11$  domains. The weighted  
1072 force histograms were then combined and the remaining analysis performed<sup>28</sup>. Our weighting of  
1073 the force histograms is similar to the weighting that has been employed in pseudo dwell time  
1074 analysis for the determination of un- and refolding rates in chains of identical titin domains<sup>33</sup>.  
1075



1076 **Extended Data**

1077 **Extended Data figures and legends**

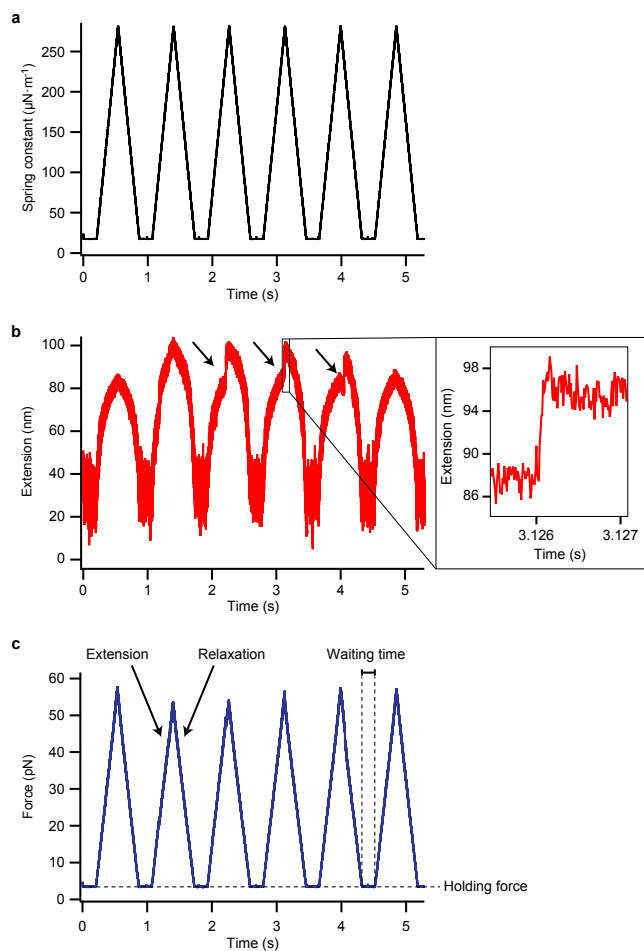

1078

1079 **Extended Data Fig. 1 | Time traces of extension-relaxation cycles.** (a) The force on a PCDH15  
1080 tether was varied by adjustment of the spring constant of the stimulus trap, which was centered  
1081 about two hundred nanometers from the equilibrium position of the probe bead. (b) The tether's  
1082 extension included occasional abrupt events (arrows). Note the extensive noise owing to thermal  
1083 excitation of the molecule. (c) The force acting on the tethered protein was computed from the  
1084 probe bead's position and the spring constant of the stimulus trap. Each protein underwent  
1085 hundreds of extension-relaxation cycles, between which the force was held constant for a  
1086 particular waiting time so that any unfolded domains could refold. The Ca<sup>2+</sup> concentration was  
1087 3 mM.

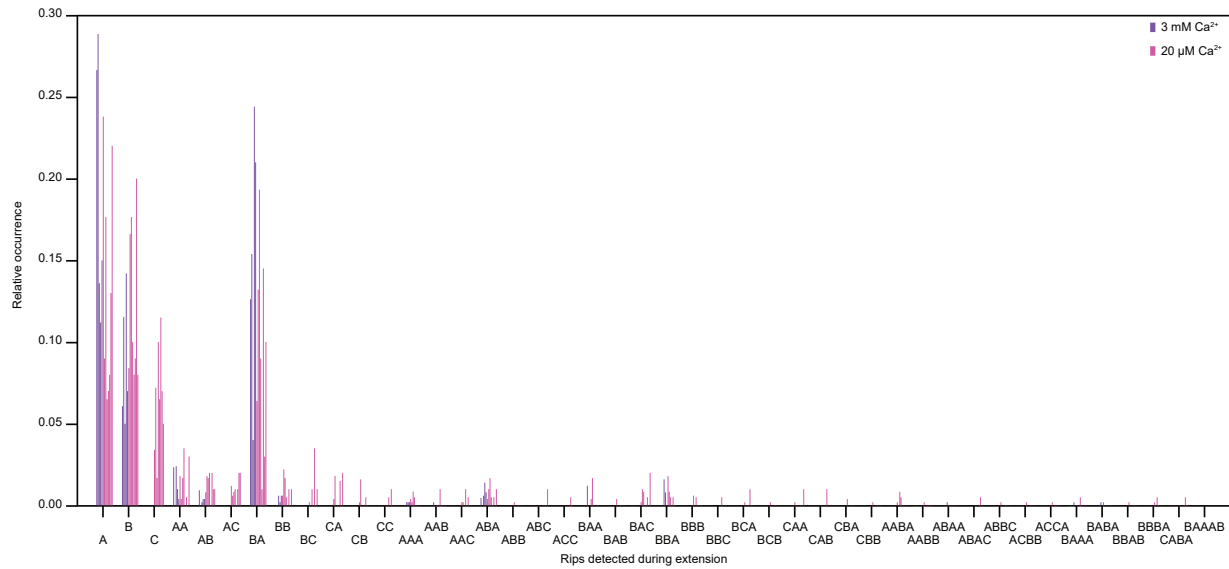

1088

1089 **Extended Data Fig. 2 | Sequences of structural changes during extension trials.** The histogram  
1090 indicates the fraction of extension traces that contained a specific sequence of unfolding events.  
1091 For each possible sequence of events, each bar in a cluster represents a single molecule. Each  
1092 molecule was extended at a loading rate of  $130 \text{ pN}\cdot\text{s}^{-1}$ . Depending on the protein, the holding  
1093 force between cycles was 2-4 pN and the waiting time was 0.2-2 s. This inconsistency altered the  
1094 extent to which a particular molecule refolded between cycles and added variability to the  
1095 results.  
1096

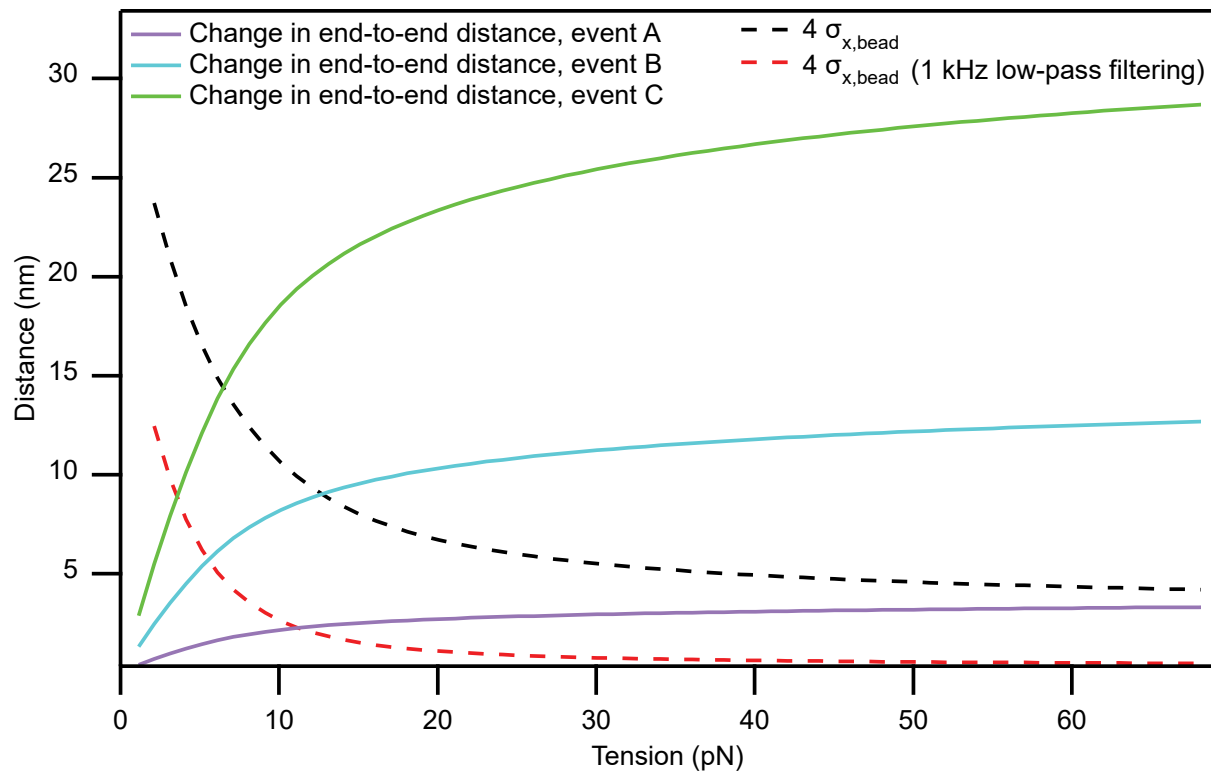

1097

1098 **Extended Data Fig. 3 | Effect of thermal noise on detectability of conformational changes.**

1099 When a molecular tether is subjected to a low tension, unfolding or refolding of a domain results  
1100 in a change in the end-to-end distance much smaller than the actual change in contour length.  
1101 The expected changes (solid lines) are shown for events of types A, B, and C. If these changes are  
1102 comparable to the thermal motion of the bead, they cannot be reliably detected by our method.  
1103 We can confidently identify a folding event if the change in end-to-end distance is larger than  
1104 four times the standard deviation of the thermal motion (black dashed line, 1 MHz bandwidth;  
1105 dashed red line, signal low-pass filtered to 1 kHz). The intersection of the dashed and solid lines  
1106 therefore defines the force below which a given structural change can no longer be reliably  
1107 resolved for a particular temporal resolution. The band-limited thermal noise in the probe bead's  
1108 position was computed as the integral of the power-spectral density of the bead's motion<sup>57,53</sup>.  
1109

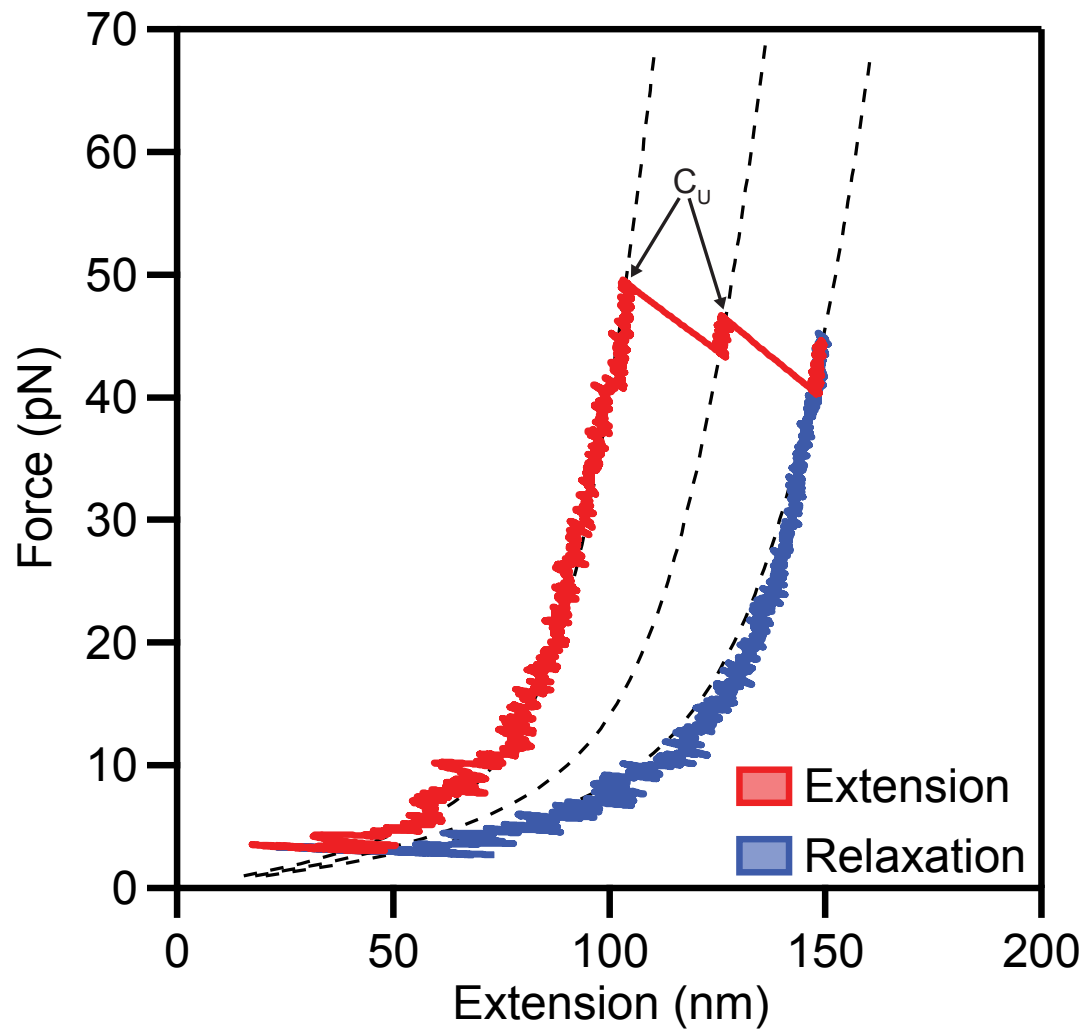

1110

1111 **Extended Data Fig. 4 | Unfolding of several cadherin domains during one extension-relaxation**

1112 **cycle.** In some extension-relaxation cycles of the protein from Fig. 2b, two cadherin domains

1113 unfolded during the extension (arrows). The Ca<sup>2+</sup> concentration was 20 μM.

1114

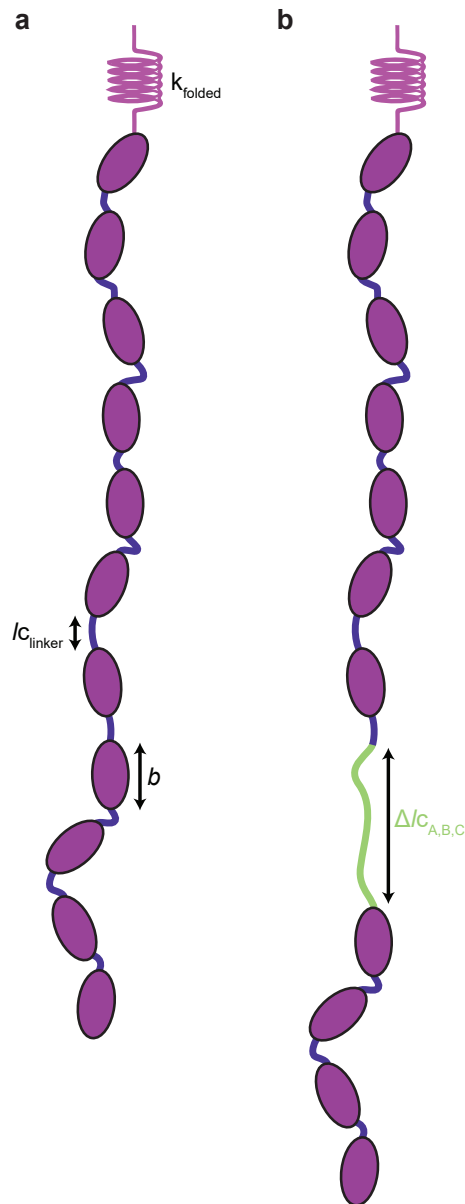

1115

1116 **Extended Data Fig. 5 | Protein model for PCDH15 under tension.** (a) We modeled a folded  
1117 monomer as a freely jointed chain of eleven stiff segments, each with length  $b$ . The linker regions  
1118 between stiff segments consist of unstructured peptides of length  $l_{\text{linker}}$ , whose combined effect  
1119 was modeled as a worm-like chain with a contour length of  $10 \cdot l_{\text{linker}}$  and persistence length  
1120  $l_p = 0.49$  nm in series with the freely-jointed chain. A Hookean spring with stiffness  $k_{\text{folded}}$   
1121 represents the enthalpic extensibility of the protein. (b) Each unfolding event was represented  
1122 as an additional worm-like chain (green), of the appropriate contour length and of persistence  
1123 length  $0.49$  nm, in series with the folded protein.

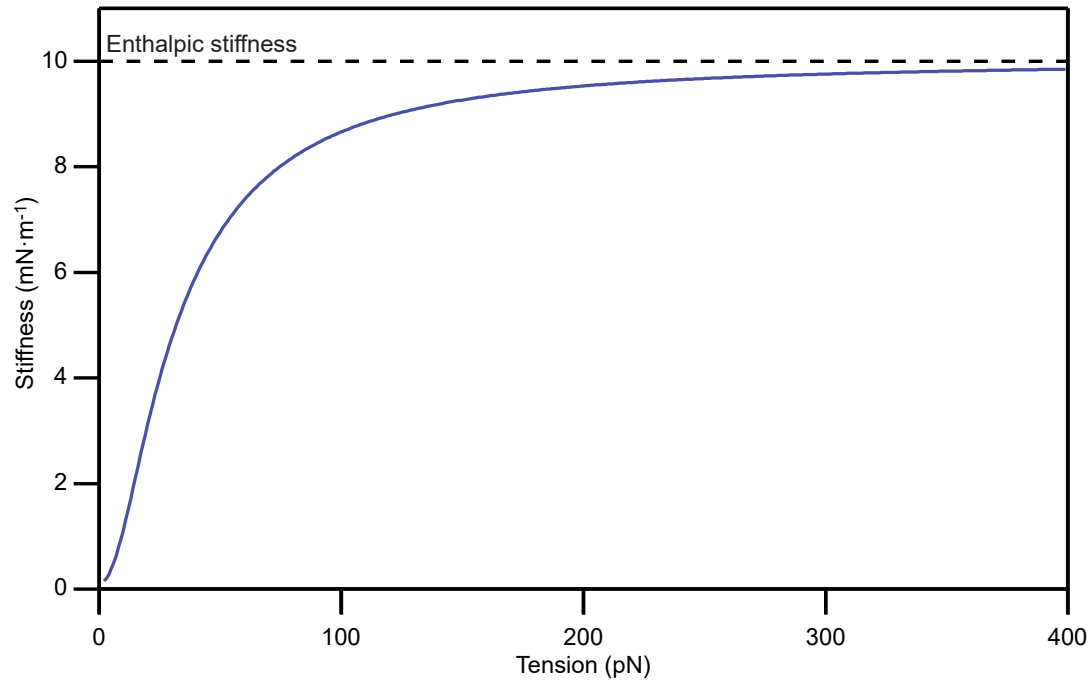

1124

1125 **Extended Data Fig. 6 | Predicted stiffness of PCDH15 at unphysiologically high forces.** Our  
1126 model predicts that monomeric PCDH15 reaches its enthalpic stiffness only for tensions  
1127 exceeding hundreds of piconewtons. The physiological range of tensions, 4 pN to 25 pN per  
1128 molecule, is dominated by the protein's entropic elasticity.  
1129

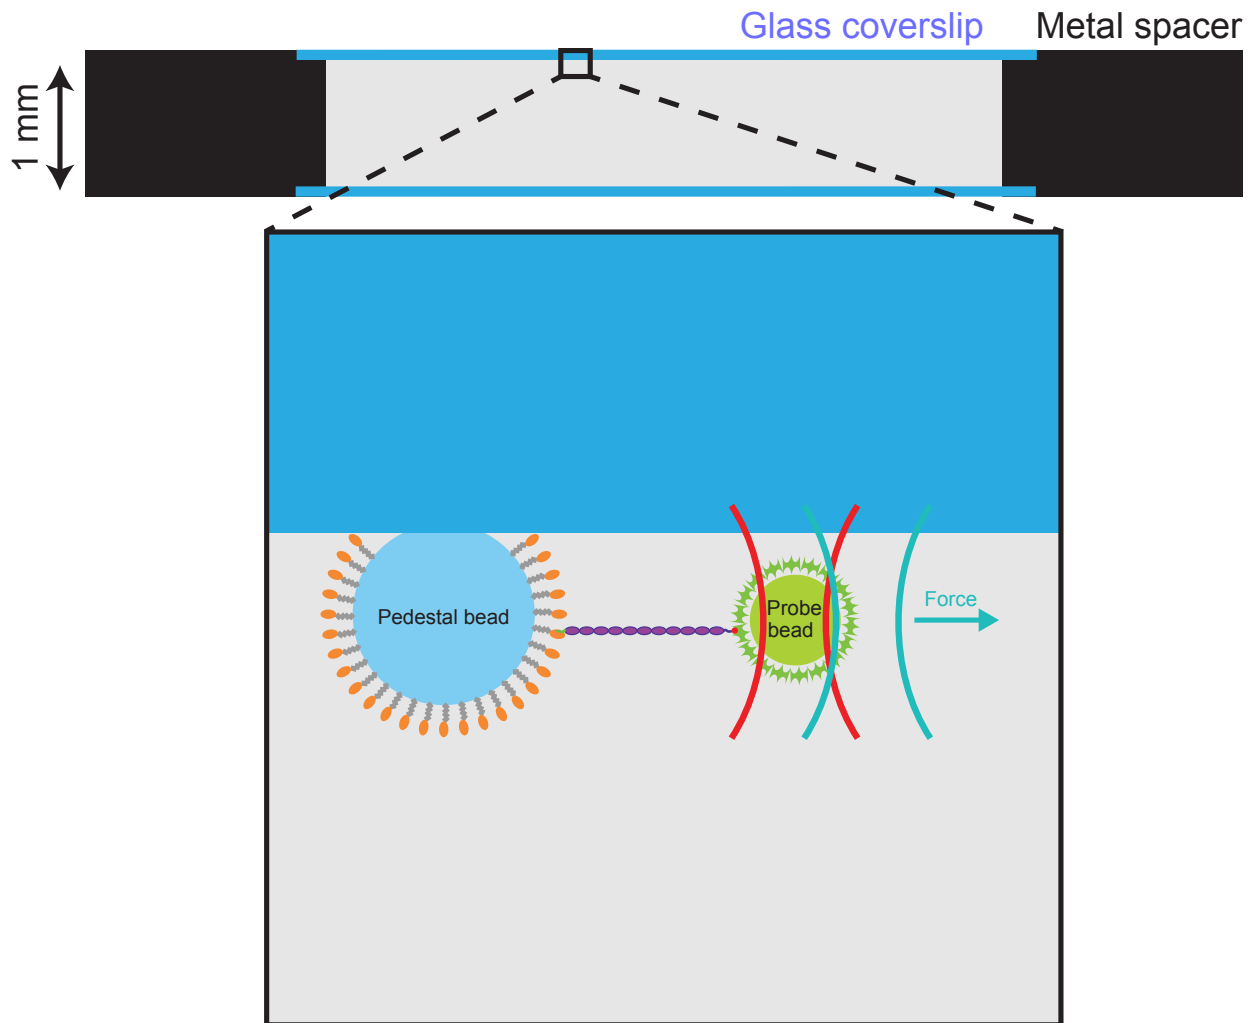

1130

1131 **Extended Data Fig. 7 | Design of the sample chamber.** The sample chamber consisted of two  
1132 glass coverslips attached by vacuum grease to a metal spacer. The sparsely distributed pedestal  
1133 beads were covalently attached to the functional surface of the upper coverslip, and the chamber  
1134 was filled with buffer solution containing freely diffusing probe beads. Note that the photonic-  
1135 force microscope was of upright design, with the objective lens positioned above the sample  
1136 chamber.  
1137

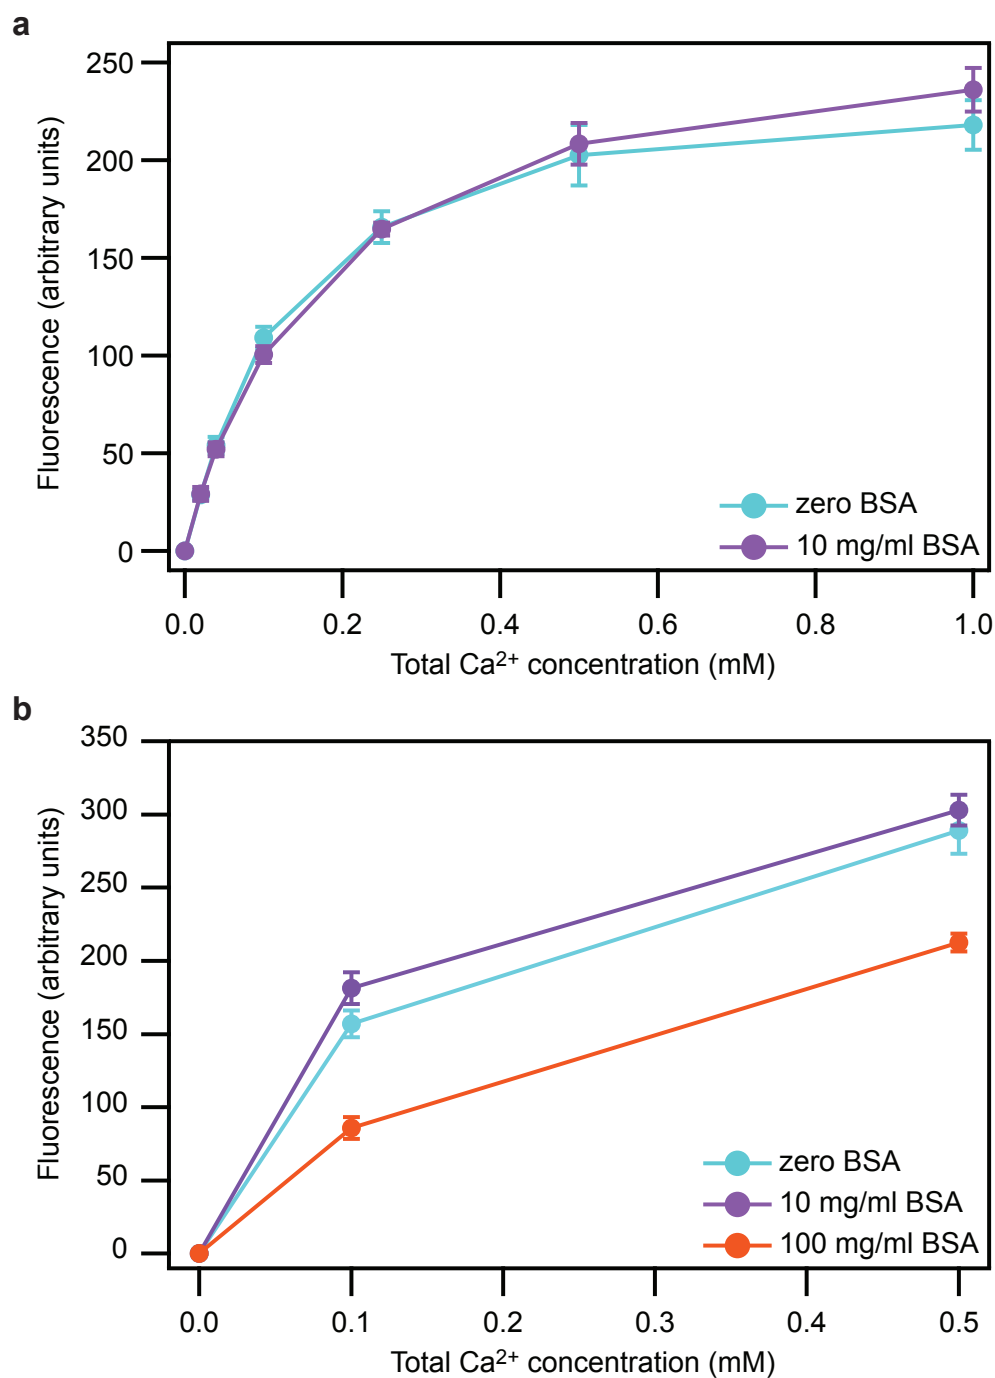

1138

1139 **Extended Data Fig. 8 | Lack of effect of bovine serum albumin (BSA) on the concentration of**  
1140 **free Ca<sup>2+</sup> ions. (a)** The fluorescence of the Ca<sup>2+</sup> indicator Fluo-5N (F14203, ThermoFisher  
1141 Scientific, Waltham, MA, USA) is unchanged in the presence of 10 mg/ml BSA. **(b)** The  
1142 concentration of free Ca<sup>2+</sup> is diminished only by the presence of a BSA concentration as great as  
1143 100 mg/ml. Data are plotted as means  $\pm$  SDs for three experiments.



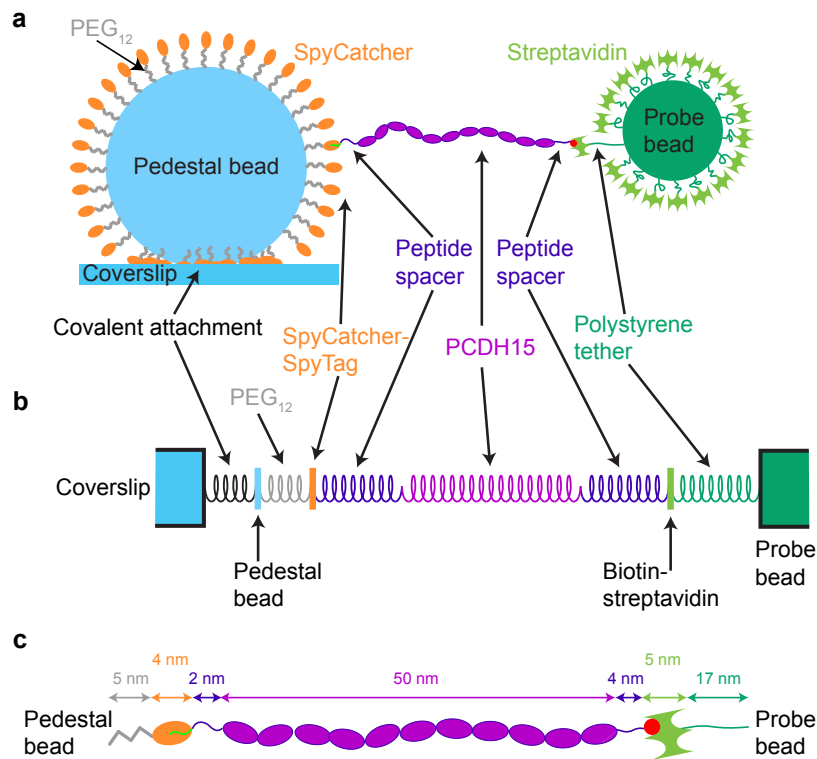

1144

1145 **Extended Data Fig. 9 | Compliant elements in the single-molecule assay.** (a) To test the stiffness  
1146 of PCDH15, we confined an individual monomer between a pedestal and a probe bead. Because  
1147 each element of the single-molecule assay is compliant, however, the stiffness of the rest of the  
1148 system—without the PCDH15—must be known in order to accurately determine the protein's  
1149 stiffness. The components are not drawn to scale. (b) The assay's compliant elements include the  
1150 covalent anchoring of the glass pedestal bead to the coverslip, the linkage between the pedestal  
1151 bead and carboxy-terminus of the protein (polyethylene glycol [PEG], SpyCatcher, SpyTag, and  
1152 peptide), and the connection between the protein's amino-terminus and the probe bead  
1153 (peptide, biotin, and streptavidin). The latter linkage might also include a short polystyrene tether  
1154 that extends from the probe bead's surface. (c) We designed the assay to contain anchor and  
1155 linker elements that were as short and stiff as possible. Their approximate contour lengths are  
1156 indicated. The size of the SpyCatcher, PCDH15, and streptavidin proteins were estimated from  
1157 their crystal structures (PDB IDs 4MLI, 6CV7, and 1AVD). The lengths of the PEG and peptides are  
1158 design lengths, and the length of the polystyrene tether was estimated from control experiments  
1159 (Extended Data Fig. 10).

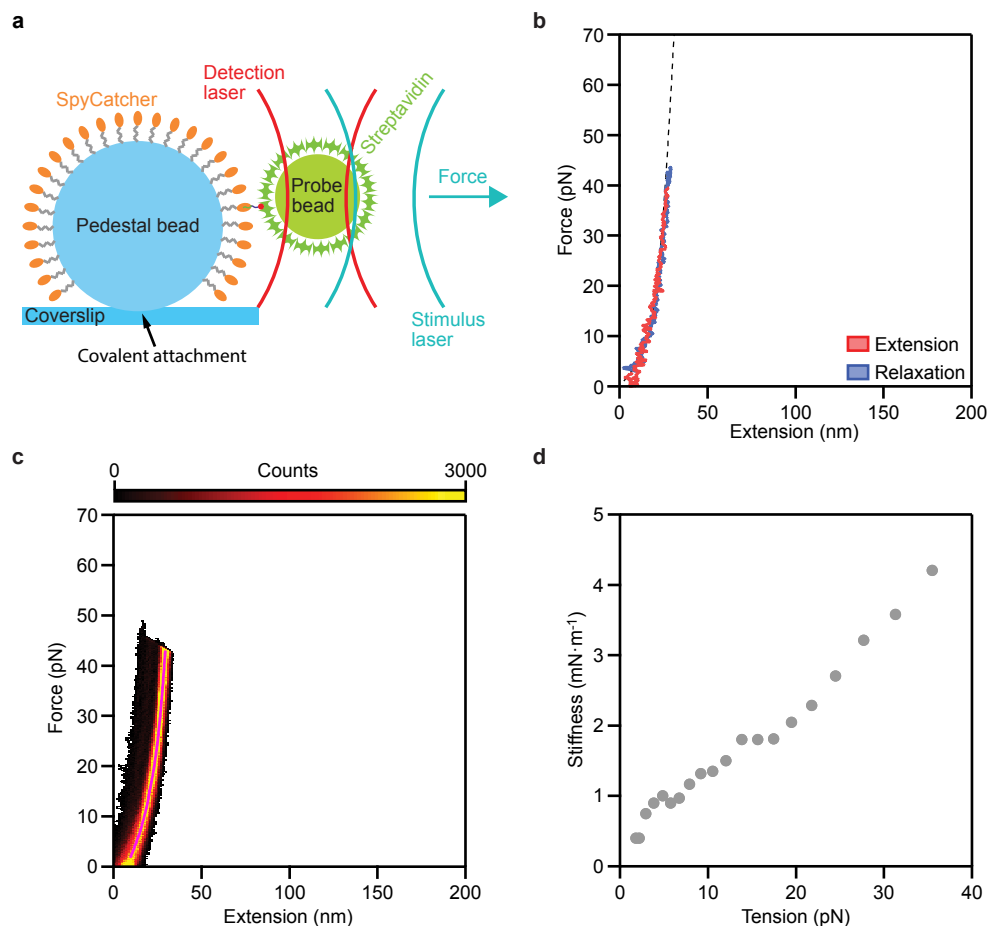

1160

1161 **Extended Data Fig. 10 | Mechanical properties of the anchors and linkers.** (a) In order to  
1162 measure the stiffness of the single-molecule assay system in the absence of PCDH15, we  
1163 connected the molecular handles (SpyTag and biotinylation peptide) through an eight-amino-  
1164 acid, flexible linker, anchored this short peptide between a pedestal and a probe bead, and  
1165 determined its force-extension relation. (b) A representative extension-relaxation cycles features  
1166 a small amount of extensibility that is well fit by a wormlike-chain model. Across nine  
1167 experiments we found an average persistence length  $l_{\text{anchors}} = 0.5 \pm 0.1$  nm, contour length  
1168  $l_{\text{anchors}} = 37 \pm 4$  nm, and Hookean spring constant  $k_{\text{anchors}} = 7.2 \pm 1.3$   $\text{mNm}^{-1}$  (means  $\pm$  SEMs). The  
1169 designed contour length of our tether including PEG, SpyCatcher, peptide, and streptavidin is  
1170 20 nm, shorter than the tether's experimentally determined contour length of 37 nm. We  
1171 accordingly conclude that the extensible polystyrene hairs on the surface of the probe beads  
1172 have an average length of 17 nm (Extended Data Fig. 9). (c) A state-space heatmap of 500

1173 extension-relaxation cycles shows only the single conformational state expected for an  
1174 unstructured peptide. These data confirm that neither of our proteinaceous anchors undergoes  
1175 structural changes over the relevant force range. **(d)** To estimate the compliance of our system  
1176 of anchors, we determined the average of the highly occupied region in the heat map (pink line  
1177 in **c**) and computed its slope.  
1178

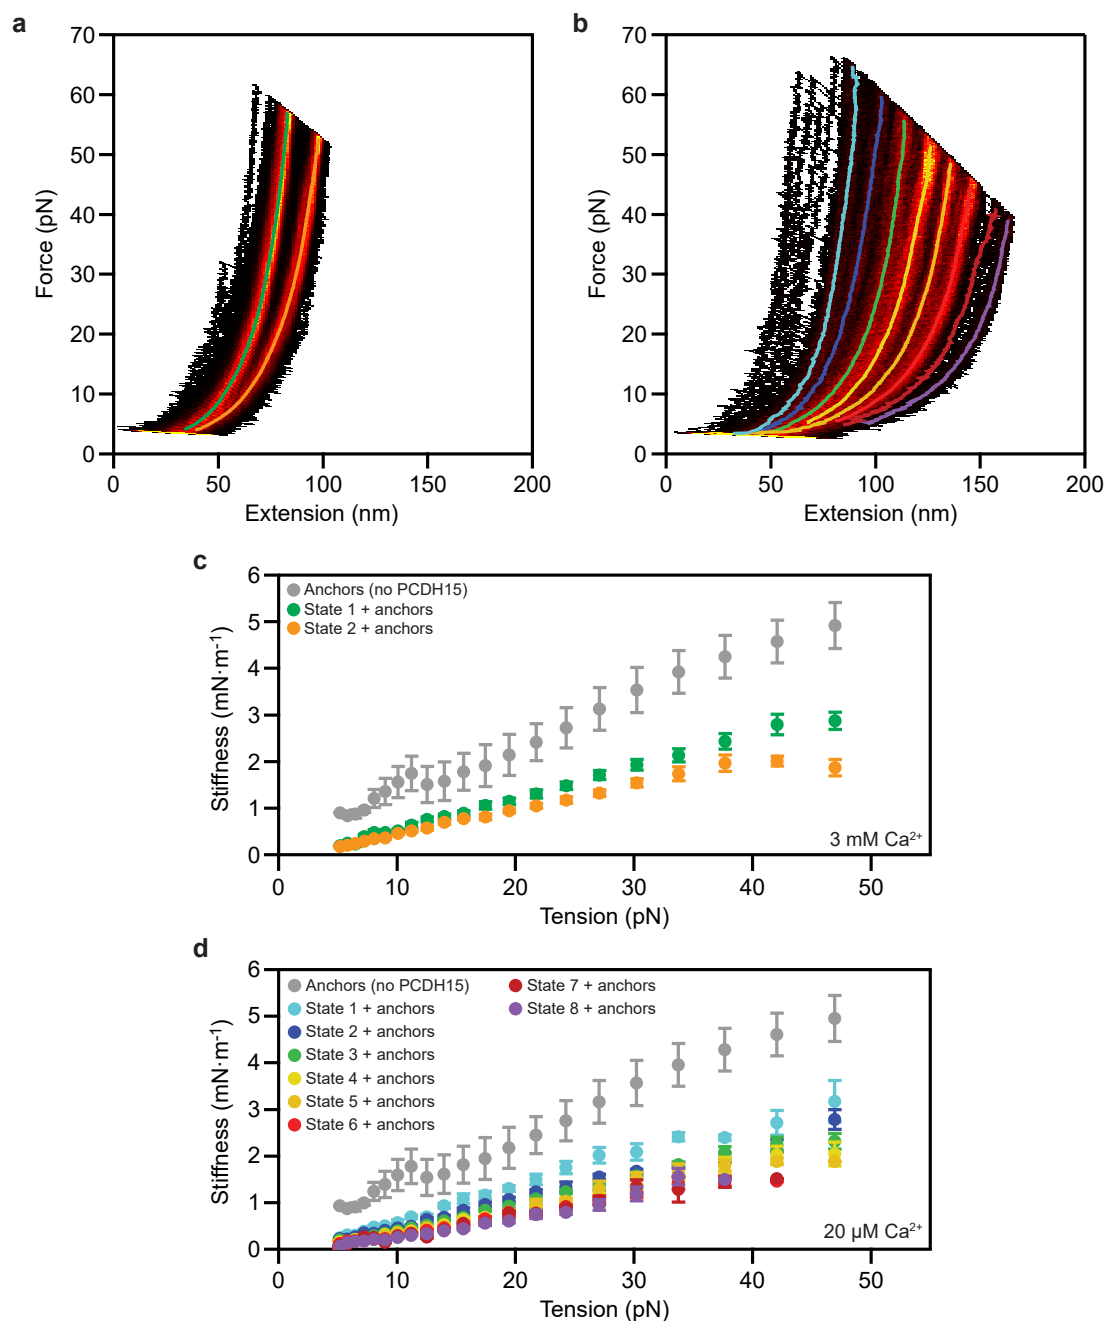

1179

1180 **Extended Data Fig. 11 | Total stiffness of the single-molecule assay system.** (a) We determined  
1181 the stiffness of PCDH15 in its different conformational states at a Ca<sup>2+</sup> concentration of 3 mM by  
1182 finding the slope of each highly occupied region of the state-space heatmap. (b) The same  
1183 operation was performed for PCDH15 in the presence of 20 μM Ca<sup>2+</sup>. (c) The resulting total  
1184 stiffnesses represent the compliances of the anchors and of PCDH15 at a Ca<sup>2+</sup> concentration of  
1185 3 mM. (d) The result for 20 μM [Ca<sup>2+</sup>] includes six additional unfolded states of progressively

1186 diminishing stiffness. As expected, for all states the total stiffness is lower than the stiffness of  
1187 the anchors alone. By treating PCDH15 and its anchors as springs in series, we can compute from  
1188 these data the stiffness of PCDH15 alone. The data in **c** and **d** are means  $\pm$  SEMs for five molecules  
1189 and six molecules at a  $\text{Ca}^{2+}$  concentration of respectively 3 mM and 20  $\mu\text{M}$ .  
1190

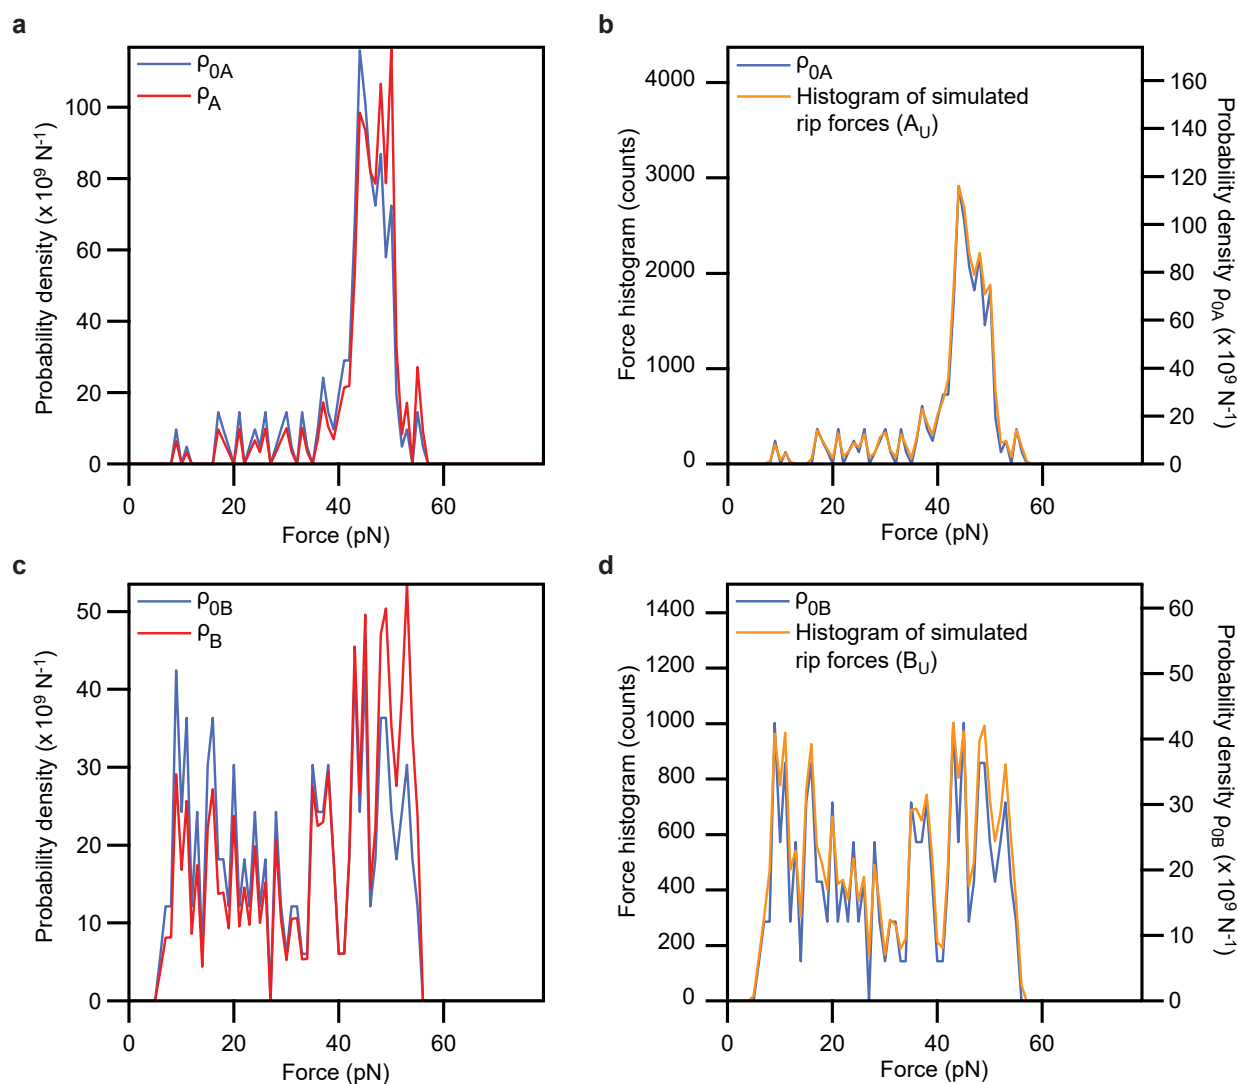

1191

1192 **Extended Data Fig. 12 | Simulation of the force distributions of the unfolding events  $A_u$  and  $B_u$ .**

1193 (a) During an extension, a rip of class A occurs with probability  $\rho_A(F)dF$ . We calculated the  
 1194 probability density  $\rho_A(F)$  from the experimentally observed force histogram of rips,  $\rho_{0A}(F)$ .

1195 (b) To confirm that our simulations successfully reproduced the experimentally observed force  
 1196 histograms, we simulated 200,000 extension trials, in each of which rips occurred with a  
 1197 probability  $\rho_A(F)dF$ . (c) A similar procedure was applied to events of class B. (d) A histogram

1198 displays the distribution expected from the simulation. For both classes of unfolding event, the  
 1199 histograms of simulated rip forces match the experimentally observed force histograms.

1200

1201 **Extended Data Tables**

1202 **Extended Data Table 1** | Confidence of tethering a single PCDH15 molecule rather than  
1203 several<sup>58</sup>.

| Ca <sup>2+</sup> concentration | Sample number | Confidence of single-molecule tethers |
|--------------------------------|---------------|---------------------------------------|
| 0                              | 1             | > 90%                                 |
| 0                              | 2             | > 85%                                 |
| 0                              | 3             | > 95%                                 |
| 0                              | 4             | > 70%                                 |
| 0                              | 5             | > 85%                                 |
| 20 $\mu$ M                     | 6             | > 85%                                 |
| 20 $\mu$ M                     | 7             | > 85%                                 |
| 20 $\mu$ M                     | 8             | > 95%                                 |
| 20 $\mu$ M                     | 9             | > 90%                                 |
| 20 $\mu$ M                     | 10            | > 95%                                 |
| 3 mM                           | 11            | > 95%                                 |
| 3 mM                           | 12            | > 85%                                 |
| 3 mM                           | 13            | > 90%                                 |
| 3 mM                           | 14            | > 95%                                 |

1204

1205

1206 **Extended Data Table 2 | Confinement of PCDH15 molecules through biotin-streptavidin**  
1207 **and SpyCatcher-SpyTag interactions.** We tested whether PCDH15 was specifically  
1208 confined between pedestals and probe beads through its amino- and carboxy-terminal  
1209 tags. Tether formation was abolished if components of either the SpyCatcher-SpyTag or  
1210 of the biotin-streptavidin pair were missing.

1211

|                                     | SpyCatcher-positive<br>Biotinylation-positive |                    | SpyCatcher-negative<br>Biotinylation-positive |                    | SpyCatcher-positive<br>Biotinylation-negative |                    |
|-------------------------------------|-----------------------------------------------|--------------------|-----------------------------------------------|--------------------|-----------------------------------------------|--------------------|
|                                     | Field of<br>view 1                            | Field of<br>view 2 | Field of<br>view 1                            | Field of<br>view 2 | Field of<br>view 1                            | Field of<br>view 2 |
| Number of<br>pedestals              | 146                                           | 163                | 89                                            | 137                | 188                                           | 168                |
| Number of<br>probe beads            | 513                                           | 493                | 0                                             | 0                  | 0                                             | 0                  |
| Mean probe<br>beads per<br>pedestal | 3.5                                           | 3.0                | 0                                             | 0                  | 0                                             | 0                  |

1212

1213



1214 **Extended Data Table 3** | Sources of uncertainty in the photonic-force microscope and  
 1215 single-molecule experiment.

1216

|   |                                                                                                                                    |                                                   |
|---|------------------------------------------------------------------------------------------------------------------------------------|---------------------------------------------------|
|   | Probe position detector: precision                                                                                                 |                                                   |
| a | Over one extension-relaxation cycle (SD, 1 Hz – 1 MHz)                                                                             | 0.3 nm                                            |
| b | Root-mean-square noise over 5 min                                                                                                  | 2 nm                                              |
|   | Probe position detector: accuracy                                                                                                  |                                                   |
| c | Calibration error (SD computed from 12 independent probe beads)                                                                    | 5 %                                               |
|   | Position of the stimulus trap relative to the position-sensing trap                                                                |                                                   |
| d | Accuracy of location of origin (peak-to-peak)                                                                                      | $\pm 4$ nm                                        |
| e | Total accuracy (RMS., from (c) and (d) for a displacement of 200 nm)                                                               | 10 nm                                             |
| f | Drift                                                                                                                              | 0.2 nm/min                                        |
|   | Spring constant of the stimulus trap: precision                                                                                    |                                                   |
| g | Root-mean-square noise over 20 s                                                                                                   | $0.27 \mu\text{N}\cdot\text{m}^{-1}$              |
| h | Drift                                                                                                                              | $0 \text{ N}\cdot\text{m}^{-1}\cdot\text{s}^{-1}$ |
| i | Spring constant of the stimulus trap: accuracy.                                                                                    | 5%                                                |
|   | Force: precision (over 5 min for 200 nm displacement of the probe bead from the stimulus trap and at maximum stimulus-laser power) |                                                   |
| j | Total precision computed from (b), (f), and (g)                                                                                    | 0.7 pN                                            |
|   | Force: accuracy (for 200 nm displacement of the probe bead from the stimulus trap and maximum stimulus laser power)                |                                                   |
| k | Total accuracy computed from (e) and (i)                                                                                           | 3.8 pN                                            |

1217

1218

1219 **Extended Data Notes**

1220 **Extended Data Note 1 | Interpretation of State 1 as folded PCDH15**

1221 We verified that conformational State 1, that with the smallest contour length (Figure 2d,e),  
1222 corresponds to fully folded PCDH15. First, we did not observe any reproducibly accessible states  
1223 with contour lengths shorter than that of State 1. Although we sporadically observe individual  
1224 force-extension relations to the left of State 1, these curves were not reproducible and likely  
1225 reflected nonspecific interactions between the pedestal or probe bead surfaces and the protein.  
1226 Second, fits of our polymer model to the data for each State 1 yielded contour lengths of  
1227  $46 \pm 7$  nm and  $47 \pm 7$  nm for  $\text{Ca}^{2+}$  concentrations of respectively 3 mM and 20  $\mu\text{M}$  (means  $\pm$  SEMs  
1228 for respectively five and eight molecules). These values accord well with a contour length of  
1229 50 nm expected for a chain of 11 cadherin domains, each 4.5 nm in length<sup>23</sup>.

1230 **Extended Data Note 2 | Influence of possible molten-globule states on domain-**  
1231 **unfolding rates.**

1232 At tensions below 20 pN and with  $\text{Ca}^{2+}$  concentrations of 20  $\mu\text{M}$  or zero, the rate of unfolding of  
1233 cadherin domains diverges from an exponential relationship and systematically reaches higher  
1234 values than expected (Figure 4). What causes this effect? It is possible that cadherin domains  
1235 refold through a long-lived molten-globule state, as occurs for other proteins with  
1236 immunoglobulin-like folds<sup>60</sup>. During the waiting time between trials, an unfolded domain might  
1237 refold completely, fold into the molten-globule state, or not refold at all. If folding occurred, the  
1238 domain might unfold during the next extension from the completely folded state or from the  
1239 molten-globule state. We cannot differentiate between these two possibilities, for they would  
1240 result in indistinguishable contour-length changes. Molten globules are known to unfold readily  
1241 at low forces<sup>60,61</sup>. Because such rapid unfolding events would increase our measured unfolding  
1242 rates, they might explain the unexpected behavior observed at low tensions.

1243 **Extended Data Note 3 | An estimate for the enthalpic stiffness of full-length, dimeric tip**  
1244 **links.**

1245 A full-length tip link consists of a dimer of PCDH15, which forms the lower one-third of the  
1246 filament, and a dimer of CDH23 that makes up the upper two-thirds of its length. For monomeric  
1247 PCDH15 we found an enthalpic stiffness of  $9 \text{ mN m}^{-1}$ . A PCDH15 dimer, made up of two  
1248 monomers in parallel, then has a stiffness of roughly  $18 \text{ mN m}^{-1}$ . If CDH23 has a similar enthalpic  
1249 stiffness per length, then the full-length dimeric tip link has a stiffness of one-third of that of  
1250 dimeric PCDH15, resulting in an estimate of  $6 \text{ mN m}^{-1}$ .
